# Supplementary material for: Expression of calcification‐related ion transporters during blue mussel larval development
Source: PubMed Central journal article supplement (PMC6662379; doi:10.1002/ece3.5287), 2019-05-29
Supplement: ECE3-9-7157-s001.pdf [file ECE3-9-7157-s001.pdf]

## Supplementary Methods

### Correcting library names

After initial data processing, some of the libraries appeared to be mislabeled. The possible library mislabeling was investigated and corrected for, by aligning the cleaned reads to a mitochondrial sequence, and clustering based on variants.

### Single nucleotide polymorphism (SNP) calling pipeline

Cleaned libraries were aligned to a *M. edulis* mitochondrion sequence (Accession: NC 006161.1) using *bwa mem* (Li and Durbin 2009) with the *-M* flag. Output from the alignment was sorted using *samtools* (*sort*) (Li et al 2009), and *Picard tools* (Broad Institute, <http://broadinstitute.github.io/picard>) were used to mark and remove duplicates (*MarkDuplicates*) and realign the alignment file (*AddOrReplaceRead-Groups*). All libraries were grouped based on calculated genotype likelihood using *samtools* (*mpileup*), and *VarScan-2* (Koboldt et al 2012) was used to detect variants. Variants were filtered based on a density level of 5 using scripts published as part of SNP calling pipeline (Quick 2014). Filtered variants file was converted to a sequence based *fasta* file using a published script (Loman 2015), which was then converted to *newick* format using *FastTree-2* (Price 2010), for viewing of the phylogenetic tree in *FigTree* (<http://tree.bio.ed.ac.uk/software/figtree/>).

Uncorrected multidimensional scaling (MDS) plots of the digital expression levels showed a clear separation among developmental stages and each of the larval families (Supplementary Figure S4). However, two of the sequenced libraries appeared to be misnamed. Treated libraries in family 003 and family 004 appeared to be mixed up in stage 2, and treated libraries at stage 5 and stage 6 appeared to be mixed up in family 004. Clustering SNPs identified by aligning all libraries to a published mitochondrion sequence (Supplementary Figure S5) confirmed that the mixup in treated libraries in stage 2 between family 003 and family 004 was due to mislabeled files and not due to biological reasons. Such a validation was not possible for the mixup in family 004 between stage 5 and stage 6, but given the clear expression trends all other libraries, the mislabeling was ‘fixed’ for further analysis (Supplementary Figure S6).

### Supplementary References

Li H, Durbin R (2009) Fast and accurate short read alignment with Burrows-Wheeler transform. *Bioinformatics* 25.14, Pages 1754–1760.

Li H, Handsaker B, Wysoker A, Fennell T, Ruan J, Homer N, Marth G, Abecasis G, Durbin R (2009) The Sequence Alignment/Map format and SAMtools. *Bioinformatics* 25.16 Pages 2078–2079.

Koboldt DC, Zhang Q, Larson DE, Shen D, McLellan MD, Lin L, Miller CA, Mardis ER, Ding L, Wilson RK (2012) *VarScan 2*: somatic mutation and copy number alteration discovery in cancer by exome sequencing. *Genome Res.* 22.3 Pages 568–576.

Quick J (2014) SNP calling pipeline. url: [https://github.com/joshquick/snp\\_calling\\_scripts](https://github.com/joshquick/snp_calling_scripts)

Loman N (2015) Misc. genomic tools. url: <https://github.com/nickloman/misc-genomics-tools/tree/master/scripts>.

Price MN, Dehal PS, Arkin AP (2010) *FastTree 2*—approximately maximum-likelihood trees for large alignments. *PLoS ONE* 5.3, e9490.

## Supplementary Figure Legends

**Supplementary Figure S1 | The morphologically distinct larval developmental stages sampled during the experiments. (a-b) Pre-calcification (c-d) Onset of calcification and larvae exhibit dorsal flattening at the region of the shell field, (e-f) Early trochophore shell covering ca 10% of larval body is observed by the presence of a small (ca. 20  $\mu\text{m}$ ) shell and birefringence (dependent on larval orientation) at the hinge area, (g-h) ca. 49% of the larval body is covered by a mineralized shell, (i-j) ca. 76% of the larval body is covered by a mineralized shell, (k-l) Larvae have secreted the PD I shell and exhibit a distinctive 'D' shape. Scale bars are 20  $\mu\text{m}$ .**

**Supplementary Figure S2 | Mean expression fold change of the 53 genes differentially expressed between control and low  $C_T$  libraries.**

**Supplementary Figure S3 | Genes encoding  $K^+$  and  $Cl^-$  transport proteins differentially expressed during the course of larval development in *M. edulis* reared under ambient conditions. Expression values (normalized read counts) by EBSeqHMM for (a-b)  $K^+$  channels: Inward rectifier  $K^+$  channels (c-e)  $Cl^-$  channels. Maximum posterior probability for all contigs are reported in Supplementary Table S7.**

**Supplementary Figure 4 | MDS plot of expression counts from filtered libraries. Boxes show possible misnamed libraries.**

**Supplementary Figure 5 | Clustering of SNPs in family 003 and 004 based on alignment to reference *M. edulis* mitochondrion sequence (Accession: NC 006161.1), C - Control, T – Treated (low  $C_T$ ).**

**Supplementary Figure 6 | MDS plot of expression counts from filtered data after adjusting misnamed libraries.**

Control

Low  $C_T$

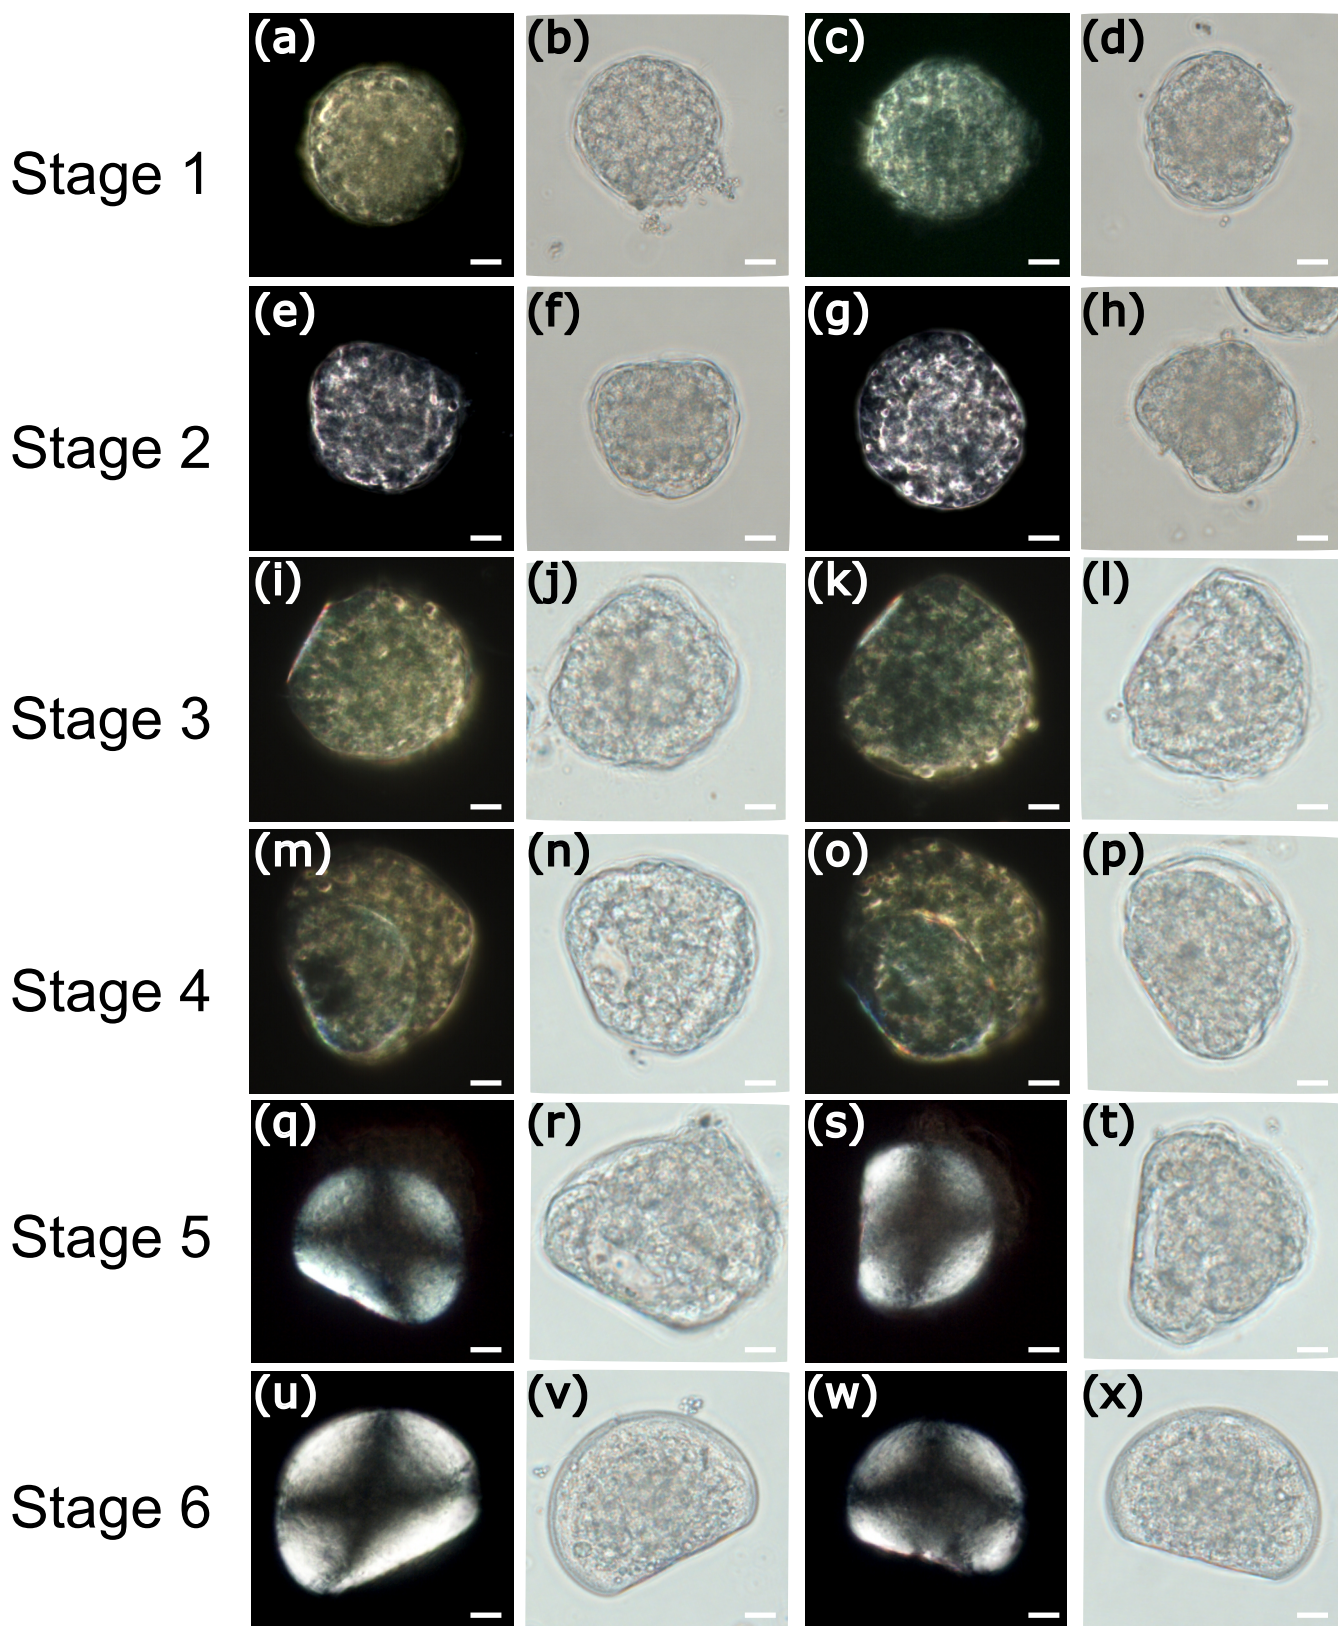

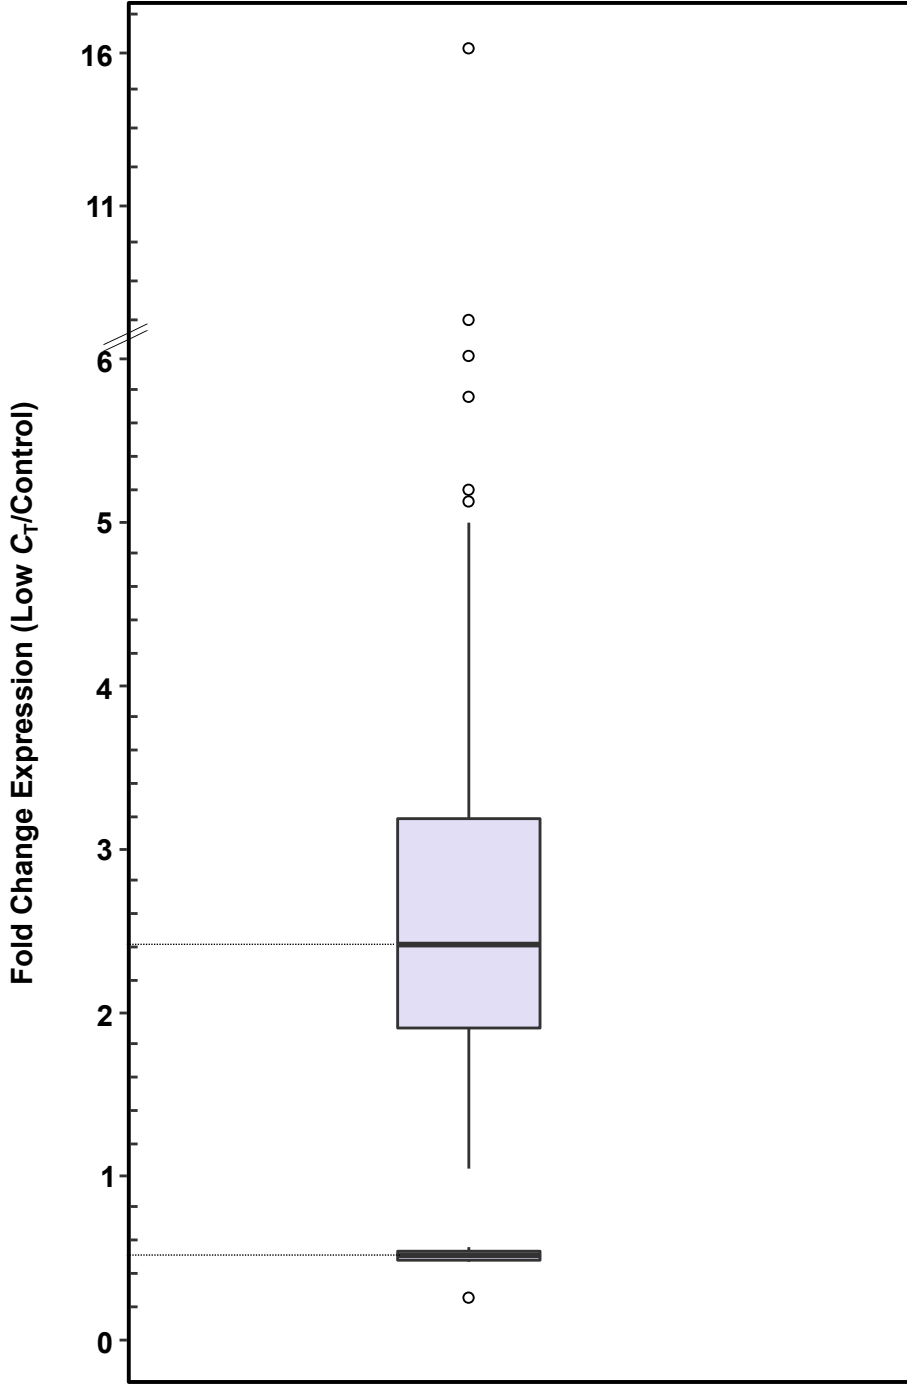

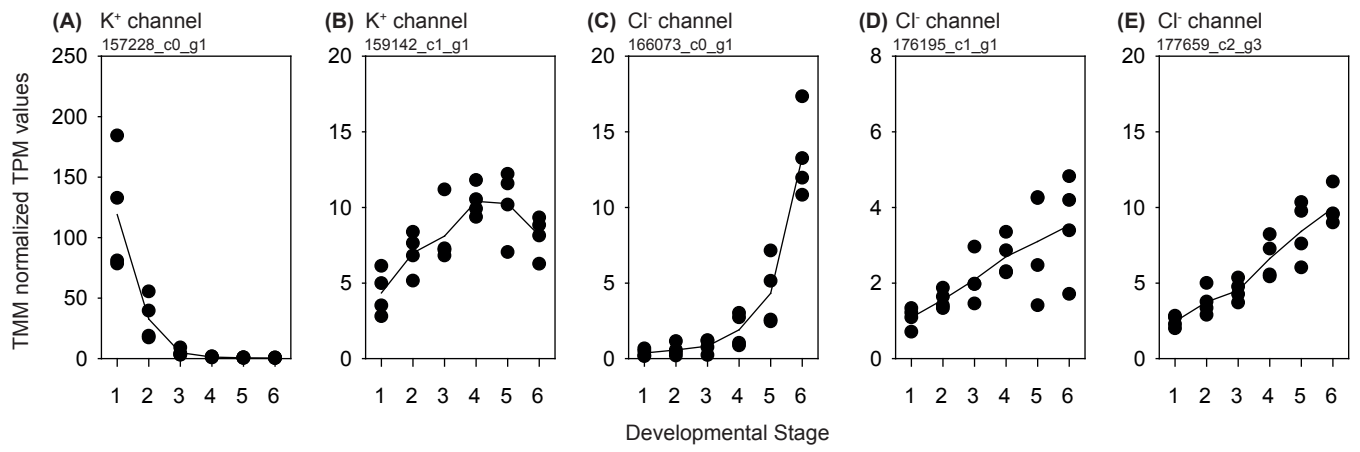

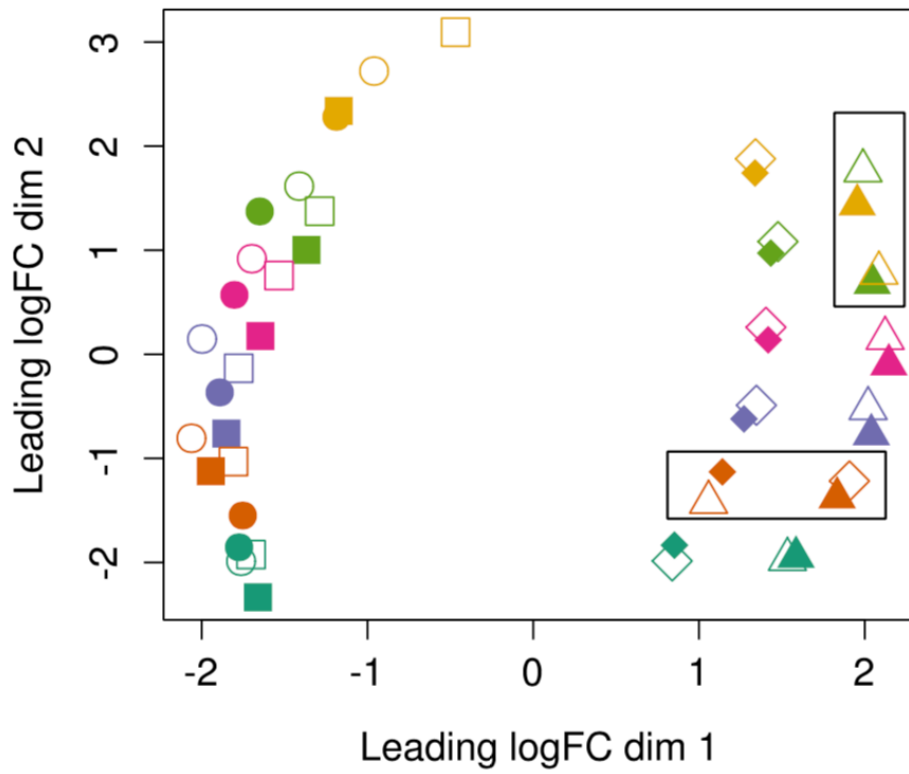

Family and Treatment

- |             |             |            |            |
|-------------|-------------|------------|------------|
| ■ 001 Cntrl | ▲ 003 Cntrl | □ 001 HCO3 | △ 003 HCO3 |
| ● 002 Cntrl | ◆ 004 Cntrl | ○ 002 HCO3 | ◇ 004 HCO3 |

Developmental Stage

- |     |     |     |     |     |     |
|-----|-----|-----|-----|-----|-----|
| ● 1 | ● 2 | ● 3 | ● 4 | ● 5 | ● 6 |
|-----|-----|-----|-----|-----|-----|

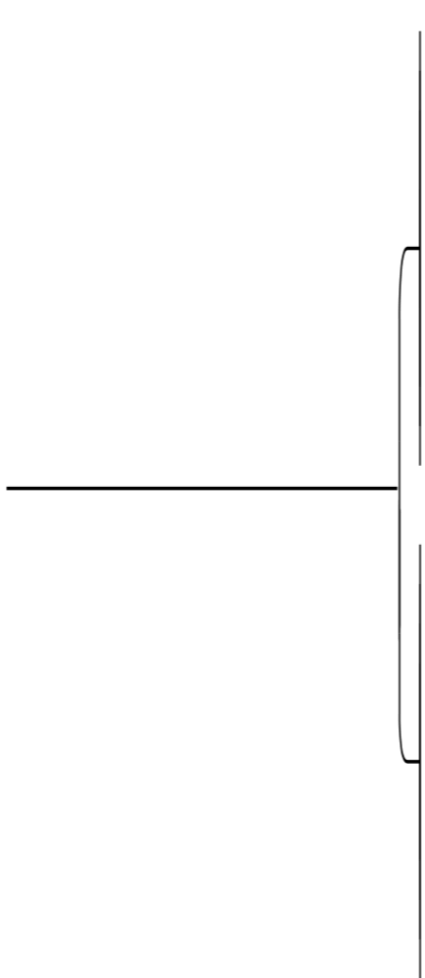

F003\_T1  
F003\_C6  
F003\_T6  
F003\_T5  
F003\_T4  
F003\_T3  
F004\_T2  
F003\_C4  
F003\_C5  
F003\_C1  
F003\_C2  
F003\_C3

ref

F004\_C1  
F004\_C2  
F004\_T6  
F003\_T2  
F004\_C6  
F004\_T1  
F004\_C4  
F004\_C5  
F004\_T4  
F004\_T5  
F004\_T3  
F004\_C3

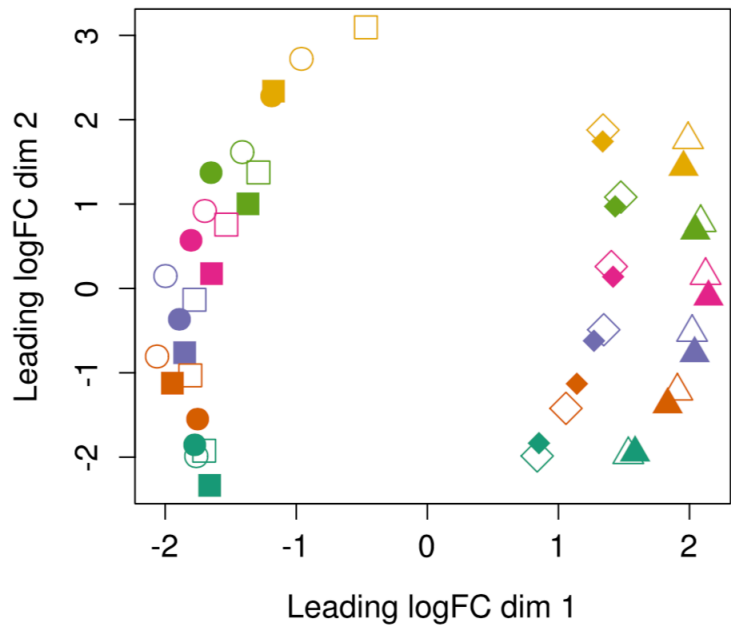

Family and Treatment

- 001 Cntrl    ▲ 003 Cntrl    □ 001 HCO3    △ 003 HCO3
- 002 Cntrl    ◆ 004 Cntrl    ○ 002 HCO3    ◇ 004 HCO3

Developmental Stage

- 1   ● 2   ● 3   ● 4   ● 5   ● 6



**Supplementary Table S1. Seawater carbonate chemistry parameters of the experiments. Parameters of CO<sub>2</sub>, HCO<sub>3</sub><sup>-</sup> and CO<sub>3</sub><sup>2-</sup> are calculated from measured C<sub>T</sub> and pH<sub>NBS</sub> using CO2SYS.**

| Experiment | Treatment              | Salinity | Temperature (°C) | pH <sub>NBS</sub> | C <sub>T</sub> (μmol kg <sup>-1</sup> seawater) | CO <sub>2</sub> (μmol/kg <sup>-1</sup> seawater) | [HCO <sub>3</sub> <sup>-</sup> ] (μmol kg <sup>-1</sup> seawater) | [CO <sub>3</sub> <sup>2-</sup> ] (μmol kg <sup>-1</sup> seawater) | pCO <sub>2</sub> (uatm) | Ω <sub>aragonite</sub> |
|------------|------------------------|----------|------------------|-------------------|-------------------------------------------------|--------------------------------------------------|-------------------------------------------------------------------|-------------------------------------------------------------------|-------------------------|------------------------|
| 1          | Control                | 15.3     | 17               | 8.211             | 1959.08                                         | 17.01                                            | 1837.62                                                           | 104.44                                                            | 433.81                  | 1.67                   |
| 1          | C <sub>T</sub> limited | 15.3     | 17               | 8.12              | 879.83                                          | 9.49                                             | 831.98                                                            | 38.34                                                             | 242.19                  | 0.61                   |
| 2          | Control                | 15.1     | 17               | 8.225             | 1942.27                                         | 16.37                                            | 1819.92                                                           | 105.977                                                           | 417.11                  | 1.70                   |
| 2          | C <sub>T</sub> limited | 15.1     | 17               | 8.161             | 919.13                                          | 9.03                                             | 866.55                                                            | 43.54                                                             | 230.14                  | 0.69                   |
| 3          | Control                | 16.1     | 17               | 8.217             | 1957.62                                         | 16.47                                            | 1832.14                                                           | 108.99                                                            | 422.09                  | 1.74                   |
| 3          | C <sub>T</sub> limited | 16.1     | 17               | 8.104             | 987.03                                          | 10.88                                            | 933.33                                                            | 42.80                                                             | 278.92                  | 0.68                   |
| 4          | Control                | 15.6     | 17               | 8.231             | 2003.24                                         | 16.47                                            | 1873.89                                                           | 112.87                                                            | 420.78                  | 1.811                  |
| 4          | C <sub>T</sub> limited | 15.6     | 17               | 8.19              | 980.86                                          | 8.90                                             | 921.45                                                            | 50.50                                                             | 227.39                  | 0.81                   |

**Supplementary Table S2. Accession ID's for protein sequences used in the phylogenetic tree in Figure 8.**

|                                           | <b>Accession ID</b> | <b>Accession Source</b> |
|-------------------------------------------|---------------------|-------------------------|
| <b>Solute carrier family 4:</b>           |                     |                         |
| <i>Stylophora pistillata</i> SLC4-alpha   | KJ829357            | NCBI                    |
| <i>Stylophora pistillata</i> SLC4-beta    | KJ829358            | NCBI                    |
| <i>Stylophora pistillata</i> SLC4-gamma   | KJ829359            | NCBI                    |
| <i>Stylophora pistillata</i> SLC4-delta   | KJ829360            | NCBI                    |
| <i>Stylophora pistillata</i> SLC4-epsilon | KJ829361            | NCBI                    |
| <i>Homo sapiens</i> SLC4A1                | B3AT_HUMAN          | Uniprot                 |
| <i>Homo sapiens</i> SLC4A2                | B3A2_HUMAN          | Uniprot                 |
| <i>Homo sapiens</i> SLC4A3                | B3A3_HUMAN          | Uniprot                 |
| <i>Homo sapiens</i> SLC4A4                | S4A4_HUMAN          | Uniprot                 |
| <i>Homo sapiens</i> SLC4A5                | S4A5_HUMAN          | Uniprot                 |
| <i>Homo sapiens</i> SLC4A7                | S4A7_HUMAN          | Uniprot                 |
| <i>Homo sapiens</i> SLC4A8                | S4A8_HUMAN          | Uniprot                 |
| <i>Homo sapiens</i> SLC4A9                | B3A4_HUMAN          | Uniprot                 |
| <i>Homo sapiens</i> SLC4A10               | S4A10_HUMAN         | Uniprot                 |
| <i>Crassostrea gigas</i> AE-2             | EKC18228.1          | NCBI                    |
| <i>Crassostrea gigas</i> SLC4-1           | EKC36355.1          | NCBI                    |
| <i>Crassostrea gigas</i> SLC4-2           | EKC35200.1          | NCBI                    |
| <i>Strongylocentrotus purpuratus</i> NBC2 | SPU_025514          | EchinoBase              |
| <b>Solute carrier family 26:</b>          |                     |                         |
| <i>Stylophora pistillata</i> SLC26-alpha  | KJ829362            | NCBI                    |
| <i>Stylophora pistillata</i> SLC26-beta   | KJ829363            | NCBI                    |
| <i>Stylophora pistillata</i> SLC26-gamma  | KJ829364            | NCBI                    |

|                              |             |         |
|------------------------------|-------------|---------|
| <i>Homo sapiens</i> SLC26A1  | S26A1_HUMAN | Uniprot |
| <i>Homo sapiens</i> SLC26A2  | S26A2_HUMAN | Uniprot |
| <i>Homo sapiens</i> SLC26A3  | S26A3_HUMAN | Uniprot |
| <i>Homo sapiens</i> SLC26A4  | S26A4_HUMAN | Uniprot |
| <i>Homo sapiens</i> SLC26A5  | S26A5_HUMAN | Uniprot |
| <i>Homo sapiens</i> SLC26A6  | S26A6_HUMAN | Uniprot |
| <i>Homo sapiens</i> SLC26A7  | S26A7_HUMAN | Uniprot |
| <i>Homo sapiens</i> SLC26A8  | S26A8_HUMAN | Uniprot |
| <i>Homo sapiens</i> SLC26A9  | S26A9_HUMAN | Uniprot |
| <i>Homo sapiens</i> SLC26A10 | S2610_HUMAN | Uniprot |
| <i>Homo sapiens</i> SLC26A11 | S2611_HUMAN | Uniprot |

**Outlier:**

|                         |            |         |
|-------------------------|------------|---------|
| <i>Danio rerio</i> CFTR | CFTR_DANRE | Uniprot |
|-------------------------|------------|---------|

---

**Supplementary Table S3. Annotations of differentially expressed contigs in treatment libraries compared to control libraries. Up and down-regulation is marked by '+' and '-' respectively.**

| Contig ID              | Annotation                                                         | Accession ID | Developmental Stage | FDR (log <sub>10</sub> )                                                                           | Fold Change                   |
|------------------------|--------------------------------------------------------------------|--------------|---------------------|----------------------------------------------------------------------------------------------------|-------------------------------|
| TRINITY_DN162334_c0_g3 |                                                                    |              | 3, 4, 5             | 5.48E <sup>-15</sup> ,<br>9.74E <sup>-20</sup> ,<br>1.54E <sup>-11</sup> ,                         | +5.77, +4.95,<br>+3.16        |
| TRINITY_DN164559_c3_g2 | TNFAIP3 interacting protein 2 ( <i>Homo sapiens</i> )              | TNIP2_HUMAN  | 3, 4, 5, 6          | 2.43E <sup>-11</sup> ,<br>3.44E <sup>-11</sup> ,<br>5.77E <sup>-10</sup> ,<br>2.40E <sup>-05</sup> | +2.62, +2.53,<br>+2.41, +2.02 |
| TRINITY_DN161315_c0_g1 | Cdc42 homolog ( <i>Drosophila melanogaster</i> )                   | CDC42_DROME  | 3, 4                | 1.69E <sup>-09</sup> ,<br>2.24E <sup>-05</sup>                                                     | +3.18, +2.42                  |
| TRINITY_DN175794_c1_g2 | Interleukin 1 receptor associated kinase 4 ( <i>Homo sapiens</i> ) | IRAK4_HUMAN  | 3, 5                | 3.31E <sup>-09</sup> ,<br>8.09E <sup>-05</sup>                                                     | +2.09, +1.75                  |
| TRINITY_DN157412_c0_g1 | NF kappa B inhibitor α ( <i>Gallus gallus</i> )                    | IKBA_CHICK   | 3, 4, 5, 6          | 4.37E <sup>-07</sup> ,<br>4.98E <sup>-06</sup> ,<br>1.46E <sup>-06</sup> ,<br>1.01E <sup>-04</sup> | +1.91, +1.82,<br>+1.86, +1.74 |
| TRINITY_DN176188_c0_g5 | Nuclear transcription factor Y subunit γ ( <i>Pongo abelii</i> )   | NFYC_PONAB   | 3, 4, 5             | 1.32E <sup>-06</sup> ,<br>2.38E <sup>-07</sup> ,<br>4.63E <sup>-07</sup>                           | +2.15, +2.21,<br>+2.18        |
| TRINITY_DN164091_c3_g1 | Excitatory amino acid transporter 3 ( <i>Mus musculus</i> )        | EAA3_MOUSE   | 3, 4                | 6.89E <sup>-06</sup> ,<br>1.26E <sup>-07</sup>                                                     | +2.47, +2.65                  |
| TRINITY_DN154143_c0_g2 | Putative uncharacterized transposon derived protein F54H12.3       | YMD3_CAEEL   | 3                   | 1.65E <sup>-05</sup> ,                                                                             | +2.98                         |

(*Caenorhabditis  
elegans*)

|                        |                                                             |                  |            |                                                                                                    |                               |
|------------------------|-------------------------------------------------------------|------------------|------------|----------------------------------------------------------------------------------------------------|-------------------------------|
| TRINITY_DN164725_c0_g5 |                                                             |                  | 3, 4, 5, 6 | 2.46E <sup>-05</sup> ,<br>5.28E <sup>-05</sup> ,<br>2.32E <sup>-06</sup> ,<br>4.57E <sup>-04</sup> | +2.32, +2.26,<br>+2.47, +2.11 |
| TRINITY_DN154643_c1_g1 | Uncharacterized protein ( <i>Crassostrea gigas</i> )        | K1RHH1_CRA GI    | 3          | 2.46E <sup>-05</sup> ,                                                                             | +3.55                         |
| TRINITY_DN156025_c1_g3 | Runt related transcription factor 1 ( <i>Homo sapiens</i> ) | RUNX1_HUMAN      | 3, 5       | 6.10E <sup>-05</sup> ,<br>3.84E <sup>-04</sup>                                                     | +2.02, +1.91                  |
| TRINITY_DN175161_c0_g6 |                                                             |                  | 3, 5       | 1.61E <sup>-04</sup> ,<br>2.32E <sup>-06</sup>                                                     | +5.13, +4                     |
| TRINITY_DN138179_c1_g3 |                                                             |                  | 3          | 1.65 E <sup>-04</sup> ,                                                                            | +4.46                         |
| TRINITY_DN152071_c1_g3 | Uncharacterized protein ( <i>Tetranychus urticae</i> )      | A0A158P512_TETUR | 3          | 3.59 E <sup>-04</sup> ,                                                                            | +2.8                          |
| TRINITY_DN25158_c0_g1  |                                                             |                  | 3          | 5.32 E <sup>-04</sup> ,                                                                            | +2.08                         |
| TRINITY_DN149718_c0_g9 |                                                             |                  | 3          | 8.42 E <sup>-04</sup> ,                                                                            | +6.02                         |
| TRINITY_DN160667_c0_g2 | Failed axon connections homolog ( <i>Homo sapiens</i> )     | FAXC_HUMAN       | 4          | 2.69E <sup>-10</sup>                                                                               | -0.52                         |
| TRINITY_DN175059_c1_g4 | Sodium-independent sulfate anion                            | S2611_MOUSE      | 4, 5       | 8.55E <sup>-07</sup> ,<br>1.34E <sup>-12</sup>                                                     | +2.32, +2.96                  |

|                        |                                                                       |               |         |                                                                          |                        |
|------------------------|-----------------------------------------------------------------------|---------------|---------|--------------------------------------------------------------------------|------------------------|
|                        | transporter ( <i>Mus musculus</i> )                                   |               |         |                                                                          |                        |
| TRINITY_DN169005_c1_g4 | ETS related transcription factor Elf 3 ( <i>Crassostrea gigas</i> )   | K1QAA0_CRA GI | 4, 5, 6 | 6.45E <sup>-06</sup> ,<br>4.01E <sup>-10</sup> ,<br>2.08E <sup>-08</sup> | +1.82, +2.14,<br>+2.05 |
| TRINITY_DN170535_c0_g2 |                                                                       |               | 4, 5    | 6.76E <sup>-05</sup> ,<br>1.94E <sup>-04</sup>                           | +3.16, +2.94           |
| TRINITY_DN168878_c0_g1 | $\alpha$ -glucosidase yihQ ( <i>Crassostrea gigas</i> )               | K1QZH8_CRA GI | 4       | 7.34E <sup>-05</sup>                                                     | +1.9                   |
| TRINITY_DN153040_c0_g1 | Uncharacterized protein ( <i>Lottia gigantea</i> )                    | V3Z9W2_LOT GI | 4       | 7.19E <sup>-04</sup>                                                     | +1.55                  |
| TRINITY_DN143945_c0_g1 |                                                                       |               | 4       | 8.29E <sup>-04</sup>                                                     | +2.46                  |
| TRINITY_DN158062_c0_g1 | Transcription factor Sox 8 ( <i>Xenopus laevis</i> )                  | SOX8_XENLA    | 5, 6    | 6.63E <sup>-10</sup> ,<br>3.05E <sup>-11</sup>                           | +2.78, +3.41           |
| TRINITY_DN165794_c0_g8 | Adipocyte plasma membrane associated protein ( <i>Bos taurus</i> )    | APMAP_BOVIN   | 5, 6    | 3.68E <sup>-06</sup> ,<br>6.04E <sup>-04</sup>                           | -0.5, -0.48            |
| TRINITY_DN85247_c0_g1  |                                                                       |               | 5, 6    | 1.14E <sup>-05</sup> ,<br>8.85E <sup>-06</sup>                           | +3.24, +3.41           |
| TRINITY_DN177115_c1_g1 | Tumor necrosis factor alpha induced protein 3 ( <i>Mus musculus</i> ) | TNAP3_MOUSE   | 5       | 1.71E <sup>-05</sup>                                                     | +1.9                   |

|                        |                                                                         |                  |      |                                                |              |
|------------------------|-------------------------------------------------------------------------|------------------|------|------------------------------------------------|--------------|
| TRINITY_DN178440_c1_g3 | Nuclear factor NF kappa B p105 subunit ( <i>Rattus norvegicus</i> )     | NFKB1_RAT        | 5    | 2.96E <sup>-05</sup>                           | +1.54        |
| TRINITY_DN164963_c0_g1 |                                                                         |                  | 5    | 3.52E <sup>-05</sup>                           | +1.6         |
| TRINITY_DN153976_c2_g1 | Nose resistant t fluoxetine protein 6 ( <i>Caenorhabditis elegans</i> ) | NRF6_CAEE        | 5    | 8.09E <sup>-05</sup>                           | +1.59        |
| TRINITY_DN176455_c1_g2 |                                                                         |                  | 5    | 2.90E <sup>-04</sup>                           | +2.23        |
| TRINITY_DN158676_c0_g1 | Ras related C3 botulinum toxin substrate 1 ( <i>Rattus norvegicus</i> ) | RAC1_RAT         | 5    | 7.10E <sup>-04</sup>                           | +2.36        |
| TRINITY_DN162758_c0_g2 | Endoglucanase E 4 ( <i>Thermobifida fusca</i> )                         | GUN4_THEFU       | 5    | 7.41E <sup>-04</sup>                           | +1.61        |
| TRINITY_DN160914_c0_g1 | Putative Ankyrin repeat protein MM 0045 ( <i>Methanosarcina mazei</i> ) | Y045_METM A      | 5, 6 | 7.41E <sup>-04</sup> ,<br>3.46E <sup>-05</sup> | +2.77, +3.31 |
| TRINITY_DN178074_c2_g4 | Zinc transporter ZIP13 ( <i>Danio rerio</i> )                           | S39AD_DANRE      | 5    | 8.14E <sup>-04</sup>                           | +2.41        |
| TRINITY_DN166023_c2_g1 | Uncharacterized protein ( <i>Arion vulgaris</i> )                       | A0A0B6ZCF8_9EUPU | 6    | 1.14E <sup>-05</sup>                           | +3.7         |
| TRINITY_DN160914_c0_g2 |                                                                         |                  | 6    | 6.40E <sup>-05</sup>                           | +3.2         |

|                        |                                                                                           |                  |   |                      |        |
|------------------------|-------------------------------------------------------------------------------------------|------------------|---|----------------------|--------|
| TRINITY_DN160789_c2_g2 |                                                                                           |                  | 6 | 8.93E <sup>-05</sup> | +1.74  |
| TRINITY_DN144435_c0_g1 | Putative C-type lectin ( <i>Haliotis discus hannai</i> )                                  | A0A0D3MJB9_HALDH | 6 | 1.77E <sup>-04</sup> | +16.11 |
| TRINITY_DN159064_c3_g3 |                                                                                           |                  | 6 | 1.83E <sup>-04</sup> | +7.16  |
| TRINITY_DN180876_c0_g1 | Retrovirus related Pol polyprotein from transposon 297 ( <i>Drosophila melanogaster</i> ) | POL2_DROM E      | 6 | 2.14E <sup>-04</sup> | -0.57  |
| TRINITY_DN168079_c0_g2 | Serine protease inhibitor dipetalogastin ( <i>Crassostrea gigas</i> )                     | K1PRF2_CRAG      | 6 | 2.27E <sup>-04</sup> | -0.26  |
| TRINITY_DN83729_c0_g1  | Mammalian ependymin related protein 1 ( <i>Homo sapiens</i> )                             | EPDR1_HUMAN      | 6 | 4.82E <sup>-04</sup> | +2.6   |
| TRINITY_DN169769_c2_g1 | Heme-binding protein 2 ( <i>Homo sapiens</i> )                                            | HEBP2_HUMAN      | 6 | 4.82E <sup>-04</sup> | +2.62  |
| TRINITY_DN147142_c0_g1 | DBH like monooxygenase protein 1 homolog ( <i>Danio rerio</i> )                           | MOXD1_DANRE      | 6 | 4.82E <sup>-04</sup> | +5.2   |
| TRINITY_DN173237_c0_g2 | Retinal dehydrogenase 2 (RALDH)( <i>Mus musculus</i> )                                    | AL1A2_MOUSE      | 6 | 4.82E <sup>-04</sup> | +1.69  |



|                        |                                                                  |                      |   |                      |       |
|------------------------|------------------------------------------------------------------|----------------------|---|----------------------|-------|
| TRINITY_DN137986_c0_g1 | Expansin yoaJ<br>( <i>Crassostrea gigas</i> )                    | K1QR4<br>5_CRA<br>GI | 6 | 4.84E <sup>-04</sup> | +4.59 |
| TRINITY_DN183378_c0_g1 | Uncharacterized<br>protein ( <i>Lottia gigantea</i> )            | V4BE89<br>_LOTGI     | 6 | 5.07E <sup>-04</sup> | +1.82 |
| TRINITY_DN148276_c0_g1 |                                                                  |                      | 6 | 5.32E <sup>-04</sup> | +3.7  |
| TRINITY_DN176745_c2_g2 | DEP domain<br>containing<br>protein 1A<br>( <i>Danio rerio</i> ) | DEP1A<br>_DANR<br>E  | 6 | 5.34E <sup>-04</sup> | -0.52 |
| TRINITY_DN157627_c0_g2 |                                                                  |                      | 6 | 5.34E <sup>-04</sup> | +3.63 |
| TRINITY_DN180865_c8_g1 | Uncharacterized<br>protein<br>( <i>Crassostrea gigas</i> )       | K1PTU<br>7_CRA<br>GI | 6 | 6.04E <sup>-04</sup> | -0.57 |
| TRINITY_DN176739_c2_g1 | Malate<br>dehydrogenase<br>( <i>Pyrococcus abyssi</i> )          | MDH_P<br>YRAB        | 6 | 6.15E <sup>-04</sup> | +1.84 |

---

**Supplementary Table S4. Number of differentially expressed contigs between developmental stages in both control and treated libraries.**

|                             | Number of differentially expressed contigs in control group | Number of differentially expressed contigs in treatment group |
|-----------------------------|-------------------------------------------------------------|---------------------------------------------------------------|
| <b>Stage 1 as baseline:</b> |                                                             |                                                               |
| Stage 2 vs.<br>Stage 1      | 228<br>-17                                                  | 369<br>-70                                                    |
| Stage 3 vs.<br>Stage 1      | 1,104<br>-590                                               | 1,763<br>-1,047                                               |
| Stage 4 vs.<br>Stage 1      | 2,588<br>-1,830                                             | 2,775<br>-2,282                                               |
| Stage 5 vs.<br>Stage 1      | 3,677<br>-3,269                                             | 3,723<br>-3,535                                               |
| Stage 6 vs.<br>Stage 1      | 4,838<br>-4,423                                             | 5,868<br>-5,544                                               |
| <b>Consecutive stages:</b>  |                                                             |                                                               |
| Stage 2 vs.<br>Stage 1      | 228<br>-17                                                  | 369<br>-70                                                    |
| Stage 3 vs.<br>Stage 2      | 87<br>-60                                                   | 283<br>-135                                                   |
| Stage 4 vs.<br>Stage 3      | 246<br>-85                                                  | 168<br>-173                                                   |
| Stage 5 vs.<br>Stage 4      | 174<br>-120                                                 | 50<br>-43                                                     |
| Stage 6 vs.<br>Stage 5      | 395<br>-589                                                 | 1,417<br>-1,278                                               |

**Supplementary Table S5. Annotations of differentially expressed contigs in larvae at Stage 2 (onset of calcification) compared to Stage 1 (pre-calcification).**

| Contig ID              | Annotation                                                  | Accession ID | FDR                  |
|------------------------|-------------------------------------------------------------|--------------|----------------------|
| TRINITY_DN119635_c0_g1 |                                                             |              | 1.49E <sup>-04</sup> |
| TRINITY_DN156475_c0_g1 | Forkhead box protein<br>L2 ( <i>Crassostrea gigas</i> )     | K1RVN0_CRAGI | 4.83E <sup>-06</sup> |
| TRINITY_DN135592_c0_g1 |                                                             |              | 1.68E <sup>-04</sup> |
| TRINITY_DN135592_c0_g2 |                                                             |              | 5.63E <sup>-06</sup> |
| TRINITY_DN30478_c0_g1  |                                                             |              | 7.23E <sup>-04</sup> |
| TRINITY_DN162074_c1_g3 | GTP-binding protein<br>GEM ( <i>Homo sapiens</i> )          | GEM_HUMAN    | 4.89E <sup>-04</sup> |
| TRINITY_DN146390_c1_g2 |                                                             |              | 6.70E <sup>-05</sup> |
| TRINITY_DN93876_c0_g2  |                                                             |              | 3.25E <sup>-04</sup> |
| TRINITY_DN48980_c0_g1  | Uncharacterized<br>protein ( <i>Crassostrea<br/>gigas</i> ) | K1QY92_CRAGI | 4.33E <sup>-05</sup> |
| TRINITY_DN157509_c0_g5 | Zinc transporter ZIP1<br>( <i>Bos taurus</i> )              | S39A1_BOVIN  | 1.07E <sup>-08</sup> |
| TRINITY_DN160567_c0_g2 |                                                             |              | 1.08E <sup>-04</sup> |
| TRINITY_DN146390_c0_g1 |                                                             |              | 1.38E <sup>-04</sup> |
| TRINITY_DN99979_c0_g1  |                                                             |              | 1.07E <sup>-08</sup> |
| TRINITY_DN17787_c0_g1  |                                                             |              | 1.50E <sup>-09</sup> |
| TRINITY_DN143936_c0_g1 |                                                             |              | 2.36E <sup>-04</sup> |
| TRINITY_DN160539_c4_g9 |                                                             |              | 1.85E <sup>-04</sup> |
| TRINITY_DN161972_c1_g1 |                                                             |              | 1.02E <sup>-07</sup> |
| TRINITY_DN153405_c3_g4 |                                                             |              | 6.78E <sup>-04</sup> |
| TRINITY_DN117209_c0_g1 |                                                             |              | 1.33E <sup>-06</sup> |
| TRINITY_DN167796_c1_g1 |                                                             |              | 2.77E <sup>-04</sup> |

|                        |                                                                                                  |                      |                      |
|------------------------|--------------------------------------------------------------------------------------------------|----------------------|----------------------|
| TRINITY_DN51677_c0_g1  |                                                                                                  |                      | 1.78E <sup>-04</sup> |
| TRINITY_DN218341_c0_g1 |                                                                                                  |                      | 1.17E <sup>-06</sup> |
| TRINITY_DN57015_c0_g1  |                                                                                                  |                      | 2.09E <sup>-04</sup> |
| TRINITY_DN106379_c0_g1 | Uncharacterized protein ( <i>Crassostrea gigas</i> )                                             | K1S2E8_CRAG          | 8.75E <sup>-05</sup> |
| TRINITY_DN128743_c0_g1 |                                                                                                  |                      | 1.65E <sup>-06</sup> |
| TRINITY_DN149108_c0_g1 |                                                                                                  |                      | 7.25E <sup>-06</sup> |
| TRINITY_DN163813_c0_g1 | Parathyroid hormone/Parathyroid hormone related peptide receptor ( <i>Didelphis virginiana</i> ) | PTH1R_DIDVI          | 4.68E <sup>-05</sup> |
| TRINITY_DN185973_c0_g1 |                                                                                                  |                      | 3.88E <sup>-05</sup> |
| TRINITY_DN169595_c0_g2 | Protein unc 93 homolog A ( <i>Xenopus laevis</i> )                                               | UN93A_XENLA          | 4.95E <sup>-06</sup> |
| TRINITY_DN160411_c0_g2 | Lactase phlorizin hydrolase ( <i>Homo sapiens</i> )                                              | LPH_HUMAN            | 1.17E <sup>-06</sup> |
| TRINITY_DN64699_c0_g2  |                                                                                                  |                      | 1.12E <sup>-05</sup> |
| TRINITY_DN169461_c0_g2 | Major egg antigen ( <i>Schistosoma mansoni</i> )                                                 | P40_SCHMA            | 6.53E <sup>-06</sup> |
| TRINITY_DN17787_c0_g2  |                                                                                                  |                      | 2.17E <sup>-04</sup> |
| TRINITY_DN43222_c0_g1  | Ferric chelate reductase 1 ( <i>Bathymodiolus platifrons</i> )                                   | A0A100XKJ2_9BI<br>VA | 1.91E <sup>-04</sup> |
| TRINITY_DN133286_c0_g1 |                                                                                                  |                      | 1.37E <sup>-06</sup> |

|                        |                                                                                                          |                      |                      |
|------------------------|----------------------------------------------------------------------------------------------------------|----------------------|----------------------|
| TRINITY_DN161508_c0_g1 | EF hand domain<br>containing protein D1<br>( <i>Crassostrea gigas</i> )                                  | K1QRD1_CRAGI         | 2.59E <sup>-07</sup> |
| TRINITY_DN144535_c0_g1 |                                                                                                          |                      | 2.41E <sup>-05</sup> |
| TRINITY_DN172433_c0_g1 | KS-rich protein<br>( <i>Mytilus coruscus</i> )                                                           | A0A0K0YB04_M<br>YTCO | 1.36E <sup>-05</sup> |
| TRINITY_DN157573_c0_g1 |                                                                                                          |                      | 1.31E <sup>-06</sup> |
| TRINITY_DN134345_c0_g1 |                                                                                                          |                      | 1.12E <sup>-05</sup> |
| TRINITY_DN145763_c0_g1 | Meprin A subunit $\alpha$<br>( <i>Homo sapiens</i> )                                                     | MEP1A_HUMAN          | 7.73E <sup>-08</sup> |
| TRINITY_DN170726_c0_g4 |                                                                                                          |                      | 1.26E <sup>-04</sup> |
| TRINITY_DN145450_c0_g1 | Metalloendopeptidase<br>( <i>Crassostrea gigas</i> )                                                     | K1S6S4_CRAGI         | 1.95E <sup>-05</sup> |
| TRINITY_DN168864_c0_g1 | Uncharacterized<br>protein ( <i>Capitella<br/>teleta</i> )                                               | R7UWJ8_CAPTE         | 5.57E <sup>-05</sup> |
| TRINITY_DN162493_c0_g3 | Uncharacterized<br>protein<br>( <i>Crassostrea gigas</i> )                                               | K1QCE7_CRAGI         | 2.99E <sup>-04</sup> |
| TRINITY_DN170889_c0_g5 |                                                                                                          |                      | 5.30E <sup>-04</sup> |
| TRINITY_DN53458_c0_g1  | Phosphatidylethanolam<br>ine-binding protein<br>homolog F40A3.3<br>( <i>Caenorhabditis<br/>elegans</i> ) | PEBPH_CAEEL          | 1.06E <sup>-05</sup> |
| TRINITY_DN132755_c0_g1 | Uncharacterized<br>protein ( <i>Lottia<br/>gigantea</i> )                                                | V4BE89_LOTGI         | 1.90E <sup>-12</sup> |
| TRINITY_DN209435_c0_g1 |                                                                                                          |                      | 5.13E <sup>-04</sup> |
| TRINITY_DN36379_c0_g1  |                                                                                                          |                      | 2.46E <sup>-04</sup> |

|                        |                                                                                      |                      |                      |
|------------------------|--------------------------------------------------------------------------------------|----------------------|----------------------|
| TRINITY_DN154992_c0_g1 | Uncharacterized protein ( <i>Lottia gigantea</i> )                                   | V4BE89_LOTGI         | 2.78E <sup>-05</sup> |
| TRINITY_DN177384_c6_g1 | Delta-like protein 1 ( <i>Rattus norvegicus</i> )                                    | DLL1_RAT             | 2.64E <sup>-08</sup> |
| TRINITY_DN165965_c0_g1 |                                                                                      |                      | 1.17E <sup>-07</sup> |
| TRINITY_DN162613_c0_g4 |                                                                                      |                      | 1.10E <sup>-04</sup> |
| TRINITY_DN171494_c0_g2 |                                                                                      |                      | 2.41E <sup>-04</sup> |
| TRINITY_DN153661_c0_g1 | Uncharacterized protein ( <i>Lottia gigantea</i> )                                   | V4AXA0_LOTGI         | 7.40E <sup>-06</sup> |
| TRINITY_DN181007_c7_g4 |                                                                                      |                      | 2.09E <sup>-04</sup> |
| TRINITY_DN181264_c6_g1 | Uncharacterized protein ( <i>Arion vulgaris</i> )                                    | A0A0B7ARG1_9E<br>UPU | 1.71E <sup>-08</sup> |
| TRINITY_DN174156_c1_g2 | Carbonic anhydrase 12 ( <i>Mus musculus</i> )                                        | CAH12_MOUSE          | 3.92E <sup>-05</sup> |
| TRINITY_DN126771_c0_g1 | Uncharacterized protein ( <i>Crassostrea gigas</i> )                                 | K1QCL4_CRAGI         | 2.09E <sup>-04</sup> |
| TRINITY_DN154918_c0_g1 |                                                                                      |                      | 4.57E <sup>-06</sup> |
| TRINITY_DN171240_c0_g1 | Protein glutamine gamma glutamyltransferase K (TG) ( <i>Canis lupus familiaris</i> ) | TGM1_CANLF           | 6.00E <sup>-04</sup> |
| TRINITY_DN161552_c1_g5 | Follistatin A ( <i>Danio rerio</i> )                                                 | FSTA_DANRE           | 4.84E <sup>-04</sup> |
| TRINITY_DN181242_c1_g3 |                                                                                      |                      | 2.77E <sup>-04</sup> |
| TRINITY_DN164779_c2_g2 | RS-rich protein 1 ( <i>Mytilus coruscus</i> )                                        | A0A0K0YAY1_M<br>YTCO | 1.65E <sup>-06</sup> |

|                        |                                                                                                               |              |                      |
|------------------------|---------------------------------------------------------------------------------------------------------------|--------------|----------------------|
| TRINITY_DN136857_c0_g1 | Stress induced protein 1( <i>Caenorhabditis elegans</i> )                                                     | SIP1_CAEEL   | 3.25E <sup>-04</sup> |
| TRINITY_DN165794_c0_g5 |                                                                                                               |              | 2.01E <sup>-05</sup> |
| TRINITY_DN147120_c0_g4 |                                                                                                               |              | 2.80E <sup>-05</sup> |
| TRINITY_DN136535_c0_g1 | Uncharacterized protein ( <i>Lottia gigantea</i> )                                                            | V4BE89_LOTGI | 3.08E <sup>-08</sup> |
| TRINITY_DN173208_c0_g1 |                                                                                                               |              | 1.40E <sup>-06</sup> |
| TRINITY_DN174212_c0_g2 | Filamin A ( <i>Crassostrea gigas</i> )                                                                        | K1RZ99_CRAGI | 3.81E <sup>-06</sup> |
| TRINITY_DN172256_c0_g2 |                                                                                                               |              | 3.79E <sup>-04</sup> |
| TRINITY_DN168269_c1_g4 |                                                                                                               |              | 2.99E <sup>-06</sup> |
| TRINITY_DN39776_c1_g1  | Tubulin $\beta$ chain ( <i>Lytechinus pictus</i> )                                                            | TBB_LYTPI    | 1.36E <sup>-04</sup> |
| TRINITY_DN178147_c0_g1 | Sushi von Willebrand factor type A EGF and pentraxin domain containing protein 1 ( <i>Rattus norvegicus</i> ) | SVEP1_RAT    | 8.85E <sup>-09</sup> |
| TRINITY_DN163507_c2_g5 | Cathepsin Z ( <i>Crassostrea gigas</i> )                                                                      | K1P5K4_CRAGI | 1.68E <sup>-05</sup> |
| TRINITY_DN55733_c0_g1  |                                                                                                               |              | 9.30E <sup>-10</sup> |
| TRINITY_DN180672_c0_g6 |                                                                                                               |              | 1.00E <sup>-04</sup> |
| TRINITY_DN160057_c0_g2 | 3-oxoacyl reductase FabG ( <i>Thermotoga maritima</i> )                                                       | FABG_THEMA   | 5.39E <sup>-08</sup> |
| TRINITY_DN130432_c0_g1 |                                                                                                               |              | 4.59E <sup>-04</sup> |
| TRINITY_DN172326_c0_g3 | P3 protein ( <i>Mus musculus</i> )                                                                            | P3_MOUSE     | 3.06E <sup>-04</sup> |
| TRINITY_DN168269_c1_g5 |                                                                                                               |              | 1.36E <sup>-04</sup> |

|                        |                                                                                       |                  |                      |
|------------------------|---------------------------------------------------------------------------------------|------------------|----------------------|
| TRINITY_DN119839_c0_g1 | Transforming growth factor $\beta$ induced protein ig-H3 ( <i>Crassostrea gigas</i> ) | K1PXW8_CRAGI     | 2.90E <sup>-04</sup> |
| TRINITY_DN166617_c0_g1 |                                                                                       |                  | 7.70E <sup>-05</sup> |
| TRINITY_DN180979_c1_g2 |                                                                                       |                  | 4.71E <sup>-07</sup> |
| TRINITY_DN169712_c1_g3 | Transgelin like protein 6 ( <i>Mytilus galloprovincialis</i> )                        | A0A0K0YB42_MYTGA | 9.55E <sup>-06</sup> |
| TRINITY_DN178271_c1_g1 | Calbindin 32 ( <i>Drosophila melanogaster</i> )                                       | CAB32_DROME      | 8.09E <sup>-04</sup> |
| TRINITY_DN163693_c0_g3 |                                                                                       |                  | 9.44E <sup>-06</sup> |
| TRINITY_DN124911_c0_g1 |                                                                                       |                  | 4.57E <sup>-06</sup> |
| TRINITY_DN177904_c5_g1 | Proline serine threonine phosphatase interacting protein 1 ( <i>Mus musculus</i> )    | PPIP1_MOUSE      | 2.77E <sup>-04</sup> |
| TRINITY_DN156801_c0_g1 | Protein Wnt-9a ( <i>Gallus gallus</i> )                                               | WNT9A_CHICK      | 9.31E <sup>-04</sup> |
| TRINITY_DN151831_c0_g1 | Uncharacterized protein ( <i>Lottia gigantea</i> )                                    | V4ADI7_LOTGI     | 1.06E <sup>-08</sup> |
| TRINITY_DN165101_c2_g2 | Excitatory amino acid transporter 2 ( <i>Mus musculus</i> )                           | EAA2_MOUSE       | 6.70E <sup>-05</sup> |
| TRINITY_DN170242_c0_g1 | Uncharacterized protein ( <i>Lottia gigantea</i> )                                    | V4AFU8_LOTGI     | 1.07E <sup>-04</sup> |
| TRINITY_DN111179_c0_g1 | Insulin gene enhancer protein ISL-3 ( <i>Oncorhynchus tshawytscha</i> )               | ISL3_ONCTS       | 2.52E <sup>-04</sup> |



|                        |                                                                                    |              |                      |
|------------------------|------------------------------------------------------------------------------------|--------------|----------------------|
| TRINITY_DN165794_c0_g8 | Adipocyte plasma membrane-associated protein ( <i>Bos taurus</i> )                 | APMAP_BOVIN  | 5.41E <sup>-09</sup> |
| TRINITY_DN181243_c4_g2 |                                                                                    |              | 1.12E <sup>-05</sup> |
| TRINITY_DN181242_c2_g3 |                                                                                    |              | 9.44E <sup>-06</sup> |
| TRINITY_DN151365_c0_g1 |                                                                                    |              | 4.30E <sup>-04</sup> |
| TRINITY_DN80739_c0_g1  |                                                                                    |              | 7.65E <sup>-05</sup> |
| TRINITY_DN165520_c0_g2 | Solute carrier organic anion transporter family member 4A1 ( <i>Mus musculus</i> ) | SO4A1_MOUSE  | 3.82E <sup>-08</sup> |
| TRINITY_DN171085_c0_g2 | Insulinoma associated protein 1a ( <i>Danio rerio</i> )                            | INS1A_DANRE  | 3.68E <sup>-05</sup> |
| TRINITY_DN180241_c1_g8 | Myosin heavy chain striated muscle ( <i>Argopecten irradians</i> )                 | MYS_ARGIR    | 6.20E <sup>-08</sup> |
| TRINITY_DN168287_c2_g1 |                                                                                    |              | 4.18E <sup>-04</sup> |
| TRINITY_DN172809_c0_g3 | Uncharacterized protein ( <i>Crassostrea gigas</i> )                               | K1RAV4_CRAGI | 1.79E <sup>-04</sup> |
| TRINITY_DN160389_c0_g2 |                                                                                    |              | 9.99E <sup>-05</sup> |
| TRINITY_DN160241_c3_g4 | Retinal-binding protein ( <i>Todarodes pacificus</i> )                             | RALB_TODPA   | 1.72E <sup>-04</sup> |
| TRINITY_DN169536_c0_g2 | Asparagine synthetase ( <i>Gallus gallus</i> )                                     | ASNS_CHICK   | 1.57E <sup>-04</sup> |
| TRINITY_DN164018_c0_g6 | Telokin ( <i>Meleagris gallopavo</i> )                                             | MYLK_MELGA   | 2.26E <sup>-04</sup> |
| TRINITY_DN167023_c0_g1 | Uncharacterized protein ( <i>Crassostrea gigas</i> )                               | K1QA71_CRAGI | 1.43E <sup>-09</sup> |

|                        |                                                                           |              |                      |
|------------------------|---------------------------------------------------------------------------|--------------|----------------------|
| TRINITY_DN157911_c0_g7 |                                                                           |              | 2.27E <sup>-05</sup> |
| TRINITY_DN163774_c0_g1 | Uncharacterized protein ( <i>Crassostrea gigas</i> )                      | K1RCI7_CRAGI | 3.15E <sup>-04</sup> |
| TRINITY_DN170121_c0_g1 | Deleted in malignant brain tumors 1 protein ( <i>Crassostrea gigas</i> )  | K1QKF1_CRAGI | 5.00E <sup>-04</sup> |
| TRINITY_DN170676_c0_g4 | $\alpha$ -mannosidase 2 ( <i>Homo sapiens</i> )                           | MA2A1_HUMAN  | 1.14E <sup>-05</sup> |
| TRINITY_DN147565_c0_g2 |                                                                           |              | 6.65E <sup>-04</sup> |
| TRINITY_DN181007_c6_g2 |                                                                           |              | 5.24E <sup>-06</sup> |
| TRINITY_DN113020_c0_g1 |                                                                           |              | 1.09E <sup>-05</sup> |
| TRINITY_DN175418_c0_g4 | Atrial natriuretic peptide converting enzyme ( <i>Homo sapiens</i> )      | CORIN_HUMAN  | 1.20E <sup>-05</sup> |
| TRINITY_DN168060_c0_g1 | Uncharacterized protein ( <i>Crassostrea gigas</i> )                      | K1REI1_CRAGI | 1.68E <sup>-06</sup> |
| TRINITY_DN155034_c0_g2 | Cysteine and glycine-rich protein 2 ( <i>Coturnix coturnix japonica</i> ) | CSRP2_COTJA  | 1.68E <sup>-05</sup> |
| TRINITY_DN180601_c6_g4 | Prestin ( <i>Homo sapiens</i> )                                           | S26A5_HUMAN  | 3.61E <sup>-08</sup> |
| TRINITY_DN177208_c0_g1 | Protein FAM46C ( <i>Danio rerio</i> )                                     | FA46C_DANRE  | 5.75E <sup>-05</sup> |
| TRINITY_DN169640_c1_g6 |                                                                           |              | 6.96E <sup>-08</sup> |
| TRINITY_DN181242_c2_g2 | Twitchin ( <i>Mytilus galloprovincialis</i> )                             | Q9GV22_MYTGA | 8.09E <sup>-07</sup> |
| TRINITY_DN172176_c0_g2 | Neuronal calcium sensor 1 ( <i>Aplysia californica</i> )                  | NCS1_APLCA   | 5.17E <sup>-05</sup> |

|                        |                                                                                             |              |                      |
|------------------------|---------------------------------------------------------------------------------------------|--------------|----------------------|
| TRINITY_DN180542_c2_g2 |                                                                                             |              | 6.34E <sup>-06</sup> |
| TRINITY_DN180672_c0_g3 |                                                                                             |              | 3.43E <sup>-05</sup> |
| TRINITY_DN167040_c2_g1 | Putative methyltransferase NSUN7 ( <i>Homo sapiens</i> )                                    | NSUN7_HUMAN  | 8.03E <sup>-04</sup> |
| TRINITY_DN163304_c0_g1 | Microtubule-associated protein ( <i>Lottia gigantea</i> )                                   | V4A5P5_LOTGI | 2.64E <sup>-08</sup> |
| TRINITY_DN162527_c0_g1 |                                                                                             |              | 1.10E <sup>-06</sup> |
| TRINITY_DN178644_c0_g1 | Adenylate cyclase type 1 (Ca/calmodulin-activated adenylyl cyclase ( <i>Mus musculus</i> )) | ADCY1_MOUSE  | 1.27E <sup>-08</sup> |
| TRINITY_DN143151_c0_g1 | Ceroid-lipofuscinosis neuronal protein 5 homolog ( <i>Mus musculus</i> )                    | CLN5_MOUSE   | 1.18E <sup>-04</sup> |
| TRINITY_DN178495_c2_g1 |                                                                                             |              | 3.59E <sup>-06</sup> |
| TRINITY_DN181242_c3_g1 | Twitchin ( <i>Mytilus galloprovincialis</i> )                                               | Q7YT99_MYTGA | 1.02E <sup>-05</sup> |
| TRINITY_DN181009_c3_g1 | Inositol 1,4,5-trisphosphate receptor type 1 ( <i>Mus musculus</i> )                        | ITPR1_MOUSE  | 8.76E <sup>-04</sup> |
| TRINITY_DN160241_c2_g1 | Retinal-binding protein ( <i>Todarodes pacificus</i> )                                      | RALB_TODPA   | 6.70E <sup>-05</sup> |
| TRINITY_DN169132_c1_g3 | Solute carrier family 15 member 4 ( <i>Xenopus laevis</i> )                                 | S15A4_XENLA  | 7.86E <sup>-05</sup> |
| TRINITY_DN155034_c0_g3 |                                                                                             |              | 5.52E <sup>-04</sup> |
| TRINITY_DN173511_c0_g5 | Von Willebrand factor D and EGF domain-                                                     | K1P6L3_CRAGI | 6.29E <sup>-04</sup> |

|                        |                                                                                            |                      |                      |
|------------------------|--------------------------------------------------------------------------------------------|----------------------|----------------------|
|                        | containing protein<br>( <i>Crassostrea gigas</i> )                                         |                      |                      |
| TRINITY_DN165888_c0_g2 | trembl- -<br>Chitin_deacetylase-<br>like_protein-<br>1_( <i>Mytilus coruscus</i> _)        | A0A0K0YAZ8_M<br>YTCO | 1.02E <sup>-05</sup> |
| TRINITY_DN164744_c0_g1 | -sprot- -<br>Paramyosin( <i>Mytilus g<br/>allopvncialis</i> )                              | MYSP_MYTGA           | 8.42E <sup>-07</sup> |
| TRINITY_DN145016_c0_g1 |                                                                                            |                      | 6.46E <sup>-05</sup> |
| TRINITY_DN159230_c0_g2 | Uncharacterized<br>protein ( <i>Arion<br/>vulgaris</i> )                                   | A0A0B6ZGK1_9E<br>UPU | 5.17E <sup>-05</sup> |
| TRINITY_DN164980_c0_g1 | Potassium voltage-<br>gated channel protein<br>Shaw ( <i>Drosophila<br/>melanogaster</i> ) | KCNAW_DROME          | 5.49E <sup>-04</sup> |
| TRINITY_DN165814_c1_g3 |                                                                                            |                      | 4.94E <sup>-04</sup> |
| TRINITY_DN158951_c0_g1 | Leucine-rich repeat-<br>containing protein 74A<br>( <i>Homo sapiens</i> )                  | LR74A_HUMAN          | 1.79E <sup>-04</sup> |
| TRINITY_DN171746_c0_g5 | Major egg antigen<br>( <i>Crassostrea gigas</i> )                                          | K1QBC3_CRAGI         | 2.30E <sup>-05</sup> |
| TRINITY_DN165306_c0_g1 | Kyphoscoliosis<br>peptidase ( <i>Crassostrea<br/>gigas</i> )                               | K1PQ64_CRAGI         | 5.74E <sup>-07</sup> |
| TRINITY_DN173216_c0_g1 | Voltage-gated<br>hydrogen channel 1<br>( <i>Gallus gallus</i> )                            | HVCN1_CHICK          | 1.92E <sup>-05</sup> |
| TRINITY_DN152699_c0_g1 |                                                                                            |                      | 7.58E <sup>-04</sup> |
| TRINITY_DN180224_c1_g1 | Uncharacterized<br>protein ( <i>Crassostrea<br/>gigas</i> )                                | K1PYE4_CRAGI         | 6.16E <sup>-09</sup> |

|                         |                                                                          |                      |                      |
|-------------------------|--------------------------------------------------------------------------|----------------------|----------------------|
| TRINITY_DN169711_c0_g1  | Neurotrypsin<br>( <i>Crassostrea gigas</i> )                             | K1R3V1_CRAGI         | 9.44E <sup>-06</sup> |
| TRINITY_DN168946_c1_g5  | Transgelin-like<br>protein-3( <i>Mytilus<br/>coruscus</i> )              | A0A0K0YAZ6_M<br>YTCO | 9.46E <sup>-04</sup> |
| TRINITY_DN169640_c1_g4  |                                                                          |                      | 5.00E <sup>-04</sup> |
| TRINITY_DN176716_c1_g1  | Whirlin ( <i>Crassostrea<br/>gigas</i> )                                 | K1QHV6_CRAGI         | 5.79E <sup>-06</sup> |
| TRINITY_DN160107_c0_g2  | Uncharacterized<br>protein ( <i>Crassostrea<br/>gigas</i> )              | K1Q4Q0_CRAGI         | 1.31E <sup>-04</sup> |
| TRINITY_DN171546_c0_g3  | Matrix<br>metalloproteinase-19<br>( <i>Homo sapiens</i> )                | MMP19_HUMAN          | 1.17E <sup>-06</sup> |
| TRINITY_DN156972_c0_g2  | Aquaporin-4 ( <i>Mus<br/>musculus</i> )                                  | AQP4_MOUSE           | 6.58E <sup>-07</sup> |
| TRINITY_DN108822_c0_g1  | Uncharacterized<br>protein ( <i>Crassostrea<br/>gigas</i> )              | K1Q679_CRAGI         | 1.08E <sup>-04</sup> |
| TRINITY_DN165433_c1_g11 |                                                                          |                      | 9.40E <sup>-04</sup> |
| TRINITY_DN141471_c0_g1  | Forkhead box protein<br>F1 ( <i>Crassostrea gigas</i> )                  | K1QD97_CRAGI         | 2.67E <sup>-06</sup> |
| TRINITY_DN158052_c0_g3  | Uncharacterized<br>protein ( <i>Lottia<br/>gigantea</i> )                | V4B5G7_LOTGI         | 7.10E <sup>-04</sup> |
| TRINITY_DN169640_c1_g5  |                                                                          |                      | 6.01E <sup>-04</sup> |
| TRINITY_DN153182_c0_g11 | Four and a half LIM<br>domains protein 2<br>( <i>Rattus norvegicus</i> ) | FHL2_RAT             | 1.28E <sup>-05</sup> |
| TRINITY_DN178500_c2_g1  | Uncharacterized<br>protein ( <i>Lottia<br/>gigantea</i> )                | V4B719_LOTGI         | 2.31E <sup>-04</sup> |

|                        |                                                                                                    |              |                      |
|------------------------|----------------------------------------------------------------------------------------------------|--------------|----------------------|
| TRINITY_DN173065_c1_g8 | Receptor-transporting protein 3 ( <i>Crassostrea gigas</i> )                                       | K1Q6J6_CRAGI | 7.11E <sup>-04</sup> |
| TRINITY_DN141305_c0_g1 | CTL-9 ( <i>Argopecten irradians</i> )                                                              | H9M3L7_ARGIR | 9.06E <sup>-04</sup> |
| TRINITY_DN159435_c1_g3 | NACHT and WD repeat domain containing protein 1 ( <i>Crassostrea gigas</i> )                       | K1PEH6_CRAGI | 1.31E <sup>-06</sup> |
| TRINITY_DN147647_c0_g1 | Cysteine-rich protein 1 ( <i>Homo sapiens</i> )                                                    | CRIP1_HUMAN  | 8.32E <sup>-05</sup> |
| TRINITY_DN171746_c0_g8 | Major egg antigen ( <i>Schistosoma mansoni</i> )                                                   | P40_SCHMA    | 5.66E <sup>-04</sup> |
| TRINITY_DN171622_c1_g5 |                                                                                                    |              | 4.70E <sup>-05</sup> |
| TRINITY_DN150421_c0_g3 | Endoprotease bli-4 ( <i>Caenorhabditis elegans</i> )                                               | BLI4_CAEEL   | 3.65E <sup>-04</sup> |
| TRINITY_DN169884_c0_g1 |                                                                                                    |              | 6.10E <sup>-05</sup> |
| TRINITY_DN180343_c1_g3 |                                                                                                    |              | 1.72E <sup>-04</sup> |
| TRINITY_DN178827_c2_g3 | Uncharacterized protein ( <i>Lottia gigantea</i> )                                                 | V4A8I7_LOTGI | 1.91E <sup>-04</sup> |
| TRINITY_DN165868_c1_g2 | Lipopolysaccharide-induced tumor necrosis factor- $\alpha$ factor homolog ( <i>Gallus gallus</i> ) | LITAF_CHICK  | 8.38E <sup>-04</sup> |
| TRINITY_DN151425_c0_g3 |                                                                                                    |              | 1.45E <sup>-05</sup> |
| TRINITY_DN180618_c0_g1 | Filamin-A ( <i>Homo sapiens</i> )                                                                  | FLNA_HUMAN   | 1.57E <sup>-05</sup> |
| TRINITY_DN158735_c0_g1 | Xaa-Pro aminopeptidase 1 ( <i>Homo sapiens</i> )                                                   | XPP1_HUMAN   | 5.13E <sup>-04</sup> |

|                        |                                                                                                         |              |                      |
|------------------------|---------------------------------------------------------------------------------------------------------|--------------|----------------------|
| TRINITY_DN149941_c0_g1 | Uncharacterized protein ( <i>Lottia gigantea</i> )                                                      | V3ZVL6_LOTGI | 1.41E <sup>-04</sup> |
| TRINITY_DN163285_c0_g1 |                                                                                                         |              | 3.77E <sup>-04</sup> |
| TRINITY_DN175808_c0_g1 |                                                                                                         |              | 3.19E <sup>-04</sup> |
| TRINITY_DN175789_c0_g1 | Multidrug resistance-associated protein 1 (Leukotriene C transporter) ( <i>Canis lupus familiaris</i> ) | MRP1_CANLF   | 1.36E <sup>-04</sup> |
| TRINITY_DN181321_c5_g1 |                                                                                                         |              | 8.68E <sup>-04</sup> |
| TRINITY_DN143314_c0_g2 |                                                                                                         |              | 8.03E <sup>-04</sup> |
| TRINITY_DN155835_c0_g1 | Sarcoplasmic calcium-binding protein ( <i>Mizuhopecten yessoensis</i> )                                 | SCP_MIZYE    | 1.00E <sup>-07</sup> |
| TRINITY_DN171569_c1_g1 | Tripartite motif-containing protein 56 ( <i>Crassostrea gigas</i> )                                     | K1QSK1_CRAGI | 6.20E <sup>-06</sup> |
| TRINITY_DN70925_c0_g1  | Uncharacterized protein ( <i>Crassostrea gigas</i> )                                                    | K1PAP3_CRAGI | 6.70E <sup>-05</sup> |
| TRINITY_DN174264_c0_g1 | Somatomedin-B and thrombospondin type-1 domain-containing protein ( <i>Bos taurus</i> )                 | SBSP0_BOVIN  | 2.20E <sup>-07</sup> |
| TRINITY_DN179350_c2_g4 | PDZ and LIM domain protein 5( <i>Crassostrea gigas</i> )                                                | K1PQ23_CRAGI | 1.59E <sup>-04</sup> |
| TRINITY_DN175603_c0_g1 | Receptor-type tyrosine-protein phosphatase ε ( <i>Homo sapiens</i> )                                    | PTPRE_HUMAN  | 1.84E <sup>-04</sup> |
| TRINITY_DN181141_c7_g1 | Von Willebrand factor D and EG domain-                                                                  | K1RSH8_CRAGI | 6.75E <sup>-07</sup> |

|                        |                                                                      |              |                      |
|------------------------|----------------------------------------------------------------------|--------------|----------------------|
|                        | containing protein<br>( <i>Crassostrea gigas</i> )                   |              |                      |
| TRINITY_DN180790_c4_g3 | Muscle M-line assembly protein unc-89 ( <i>Crassostrea gigas</i> )   | K1RUG0_CRAGI | 3.58E <sup>-04</sup> |
| TRINITY_DN158068_c0_g3 | Actin-2 ( <i>Lumbricus terrestris</i> )                              | ACT2_LUMTE   | 6.84E <sup>-06</sup> |
| TRINITY_DN40608_c0_g2  |                                                                      |              | 9.17E <sup>-04</sup> |
| TRINITY_DN178763_c1_g1 |                                                                      |              | 1.90E <sup>-04</sup> |
| TRINITY_DN176510_c1_g2 | Kyphoscoliosis peptidase ( <i>Mus musculus</i> )                     | KY_MOUSE     | 1.57E <sup>-05</sup> |
| TRINITY_DN137215_c0_g1 | Uridine phosphorylase 1 ( <i>Homo sapiens</i> )                      | UPP1_HUMAN   | 2.09E <sup>-04</sup> |
| TRINITY_DN176604_c0_g2 | Membrane metallo-endopeptidase-like 1 (NEP2) ( <i>Homo sapiens</i> ) | MMEL1_HUMAN  | 6.69E <sup>-06</sup> |
| TRINITY_DN179325_c0_g2 | Fibulin-2 ( <i>Mus musculus</i> )                                    | FBLN2_MOUSE  | 4.01E <sup>-04</sup> |
| TRINITY_DN165677_c4_g1 |                                                                      |              | 6.44E <sup>-04</sup> |
| TRINITY_DN181271_c0_g2 | Dystonin ( <i>Mus musculus</i> )                                     | DYST_MOUSE   | 3.09E <sup>-06</sup> |
| TRINITY_DN157598_c0_g1 | Junctophilin-1 ( <i>Mus musculus</i> )                               | JPH1_MOUSE   | 7.40E <sup>-06</sup> |
| TRINITY_DN171593_c0_g1 | Protein fem-1 homolog C ( <i>Danio rerio</i> )                       | FEM1C_DANRE  | 4.89E <sup>-04</sup> |
| TRINITY_DN159603_c0_g2 | Inhibitory POU protein ( <i>Drosophila melanogaster</i> )            | IPOU_DROME   | 3.89E <sup>-04</sup> |



|                         |                                                                                        |              |                      |
|-------------------------|----------------------------------------------------------------------------------------|--------------|----------------------|
| TRINITY_DN157616_c1_g5  | Myophilin<br>( <i>Echinococcus granulosus</i> )                                        | MYPH_ECHGR   | 4.94E <sup>-04</sup> |
| TRINITY_DN180244_c4_g2  | Uncharacterized protein ( <i>Crassostrea gigas</i> )                                   | K1Q3F5_CRAGI | 6.00E <sup>-04</sup> |
| TRINITY_DN167783_c1_g6  | Actin adductor muscle ( <i>Placopecten magellanicus</i> )                              | ACT_PLAMG    | 4.00E <sup>-05</sup> |
| TRINITY_DN174226_c0_g5  | Sodium and chloride-dependent glycine transporter 2 ( <i>Homo sapiens</i> )            | SC6A5_HUMAN  | 1.12E <sup>-05</sup> |
| TRINITY_DN180737_c4_g1  | Polypeptide N-acetylgalactosaminyltransferase 1 ( <i>Homo sapiens</i> )                | GALT1_HUMAN  | 1.67E <sup>-05</sup> |
| TRINITY_DN174419_c2_g5  | Aquaporin-4 ( <i>Bos taurus</i> )                                                      | AQP4_BOVIN   | 3.09E <sup>-06</sup> |
| TRINITY_DN172100_c0_g1  | Synaptopodin-2 ( <i>Crassostrea gigas</i> )                                            | K1Q2X5_CRAGI | 1.71E <sup>-08</sup> |
| TRINITY_DN128736_c0_g1  | Peroxidasin-like protein ( <i>Crassostrea gigas</i> )                                  | K1PG33_CRAGI | 9.34E <sup>-04</sup> |
| TRINITY_DN176703_c1_g2  | Voltage-dependent L-type calcium channel subunit $\alpha$ ( <i>Crassostrea gigas</i> ) | K1QEL8_CRAGI | 3.08E <sup>-08</sup> |
| TRINITY_DN170085_c0_g1  | Glutamate receptor ionotropic NMDA 2B ( <i>Homo sapiens</i> )                          | NMDE2_HUMAN  | 7.25E <sup>-04</sup> |
| TRINITY_DN173994_c1_g10 | Troponin I ( <i>Chlamys nipponensis akazara</i> )                                      | TNNI_CHLNI   | 5.13E <sup>-04</sup> |
| TRINITY_DN175773_c0_g2  | Potassium voltage-gated channel protein                                                | KCNAL_DROME  | 5.17E <sup>-05</sup> |

|                        | Shal ( <i>Drosophila melanogaster</i> )                                                 |                      |                      |
|------------------------|-----------------------------------------------------------------------------------------|----------------------|----------------------|
| TRINITY_DN170789_c0_g1 | Uncharacterized protein ( <i>Crassostrea gigas</i> )                                    | K1Q856_CRAGI         | 1.40E <sup>-04</sup> |
| TRINITY_DN175685_c1_g2 | Uncharacterized protein ( <i>Arion vulgaris</i> )                                       | A0A0B6YXZ9_9E<br>UPU | 2.09E <sup>-04</sup> |
| TRINITY_DN164856_c3_g1 | Calponin-1 ( <i>Gallus gallus</i> )                                                     | CNN1_CHICK           | 8.22E <sup>-04</sup> |
| TRINITY_DN169884_c0_g3 |                                                                                         |                      | 1.14E <sup>-04</sup> |
| TRINITY_DN151756_c0_g1 | Integrin $\beta$ -5 ( <i>Bos taurus</i> )                                               | ITB5_BOVIN           | 1.86E <sup>-04</sup> |
| TRINITY_DN134224_c0_g1 | Insulin gene enhancer protein ISL-1 ( <i>Rattus norvegicus</i> )                        | ISL1_RAT             | 5.66E <sup>-04</sup> |
| TRINITY_DN162423_c0_g3 | Small conductance calcium-activated potassium channel protein 2 ( <i>Homo sapiens</i> ) | KCNN2_HUMAN          | 8.93E <sup>-04</sup> |
| TRINITY_DN160540_c3_g2 | Sodium-coupled monocarboxylate transporter 1 ( <i>Homo sapiens</i> )                    | SC5A8_HUMAN          | 7.31E <sup>-04</sup> |
| TRINITY_DN179779_c5_g2 |                                                                                         |                      | 4.61E <sup>-07</sup> |
| TRINITY_DN181260_c4_g1 | LIM domain and actin-binding protein 1 ( <i>Crassostrea gigas</i> )                     | K1QT91_CRAGI         | 3.79E <sup>-04</sup> |
| TRINITY_DN179098_c3_g3 | Uncharacterized protein ( <i>Crassostrea gigas</i> )                                    | K1RE15_CRAGI         | 8.03E <sup>-04</sup> |
| TRINITY_DN137669_c0_g1 |                                                                                         |                      | 2.78E <sup>-04</sup> |

|                        |                                                                                       |              |                      |
|------------------------|---------------------------------------------------------------------------------------|--------------|----------------------|
| TRINITY_DN180712_c8_g2 |                                                                                       |              | 1.01E <sup>-05</sup> |
| TRINITY_DN170528_c0_g1 | Inositol-3-phosphate<br>synthase 1-B ( <i>Xenopus<br/>laevis</i> )                    | INO1B_XENLA  | 5.63E <sup>-06</sup> |
| TRINITY_DN147265_c0_g1 | Heart and neural crest<br>derivatives expressed<br>protein 2 ( <i>Danio rerio</i> )   | HAND2_DANRE  | 2.90E <sup>-04</sup> |
| TRINITY_DN63689_c0_g1  |                                                                                       |              | 4.12E <sup>-05</sup> |
| TRINITY_DN179234_c0_g4 | Trafficking protein<br>particle complex<br>subunit 4 ( <i>Crassostrea<br/>gigas</i> ) | K1QNE7_CRAGI | 1.91E <sup>-04</sup> |
| TRINITY_DN179091_c4_g1 |                                                                                       |              | 2.20E <sup>-05</sup> |
| TRINITY_DN144067_c0_g2 |                                                                                       |              | 2.78E <sup>-04</sup> |
| TRINITY_DN153348_c0_g1 |                                                                                       |              | 1.07E <sup>-04</sup> |
| TRINITY_DN159919_c2_g3 |                                                                                       |              | 5.30E <sup>-04</sup> |
| TRINITY_DN151657_c0_g1 | Uncharacterized<br>protein ( <i>Crassostrea<br/>gigas</i> )                           | K1RQH6_CRAGI | 5.37E <sup>-04</sup> |
| TRINITY_DN169166_c0_g1 | WEE1-like protein<br>kinase 1-B ( <i>Xenopus<br/>laevis</i> )                         | WEE1B_XENLA  | 2.20E <sup>-06</sup> |
| TRINITY_DN179730_c7_g3 |                                                                                       |              | 1.23E <sup>-04</sup> |
| TRINITY_DN109592_c0_g1 | Collagen $\alpha$ -1 chain<br>( <i>Crassostrea gigas</i> )                            | K1R0L2_CRAGI | 8.16E <sup>-05</sup> |
| TRINITY_DN179876_c1_g8 |                                                                                       |              | 6.35E <sup>-04</sup> |
| TRINITY_DN151440_c0_g4 |                                                                                       |              | 2.62E <sup>-09</sup> |
| TRINITY_DN167317_c0_g3 | Prestin ( <i>Mus musculus</i> )                                                       | S26A5_MOUSE  | 6.16E <sup>-09</sup> |

---



**Supplementary Table S6. Expression profiles of contigs encoding SMPs in Baltic *M. edulis*-like larvae. EE refers to equally expressed.**

| <b>SMPs and SMP related domains</b> | <b>Contig_ID</b>       | <b>Expression profile</b> | <b>Maximum posterior probability</b> |
|-------------------------------------|------------------------|---------------------------|--------------------------------------|
| $\alpha$ _CA_(Nacrein)              | TRINITY_DN165584_c2_g1 | Down-Up-Up-Up-Up          | 0.5072                               |
| $\alpha$ _CA_(Nacrein)              | TRINITY_DN170492_c0_g2 | Up-Down-Down-Down-Down    | 1                                    |
| $\alpha$ _CA_(Nacrein)              | TRINITY_DN172452_c1_g4 | EE-EE-Up-Up-EE            | 0.4648                               |
| $\alpha$ _CA_(Nacrein)              | TRINITY_DN174156_c1_g2 | Down-Up-Up-Up-Down        | 0.4826                               |
| Amine_oxidase                       | TRINITY_DN181138_c7_g5 | Down-Up-Up-Up-Up          | 0.872                                |
| $\beta$ _Thymosin                   | TRINITY_DN170261_c1_g2 | Down-Up-Up-Up-Up          | 0.9223                               |
| B-hexosaminodase                    | TRINITY_DN158110_c0_g2 | Down-Up-Up-Up-Up          | 0.7494                               |
| B-hexosaminodase                    | TRINITY_DN161171_c0_g1 | Down-Up-Up-Up-Up          | 0.562                                |
| B-hexosaminodase                    | TRINITY_DN165446_c0_g1 | Down-Up-Down-Down-Down    | 0.4996                               |
| B-hexosaminodase                    | TRINITY_DN177006_c2_g4 | Down-Up-Up-Up-Up          | 0.6592                               |
| B-hexosaminodase                    | TRINITY_DN177547_c1_g1 | Down-Up-Up-Up-Up          | 0.8364                               |
| B-lactamase_(Gigasins6)             | TRINITY_DN175515_c2_g6 | Up-Down-Down-Down-Down    | 0.7507                               |
| B-lactamase_(Gigasins6)             | TRINITY_DN176457_c3_g4 | Down-Down-Up-Up-Down      | 0.4305                               |
| BPTI_Kunitz                         | TRINITY_DN151020_c0_g1 | Down-Up-Up-Up-Down        | 0.913                                |
| BPTI_Kunitz                         | TRINITY_DN161426_c0_g1 | Down-Up-Up-Up-Up          | 0.8287                               |
| BPTI_Kunitz                         | TRINITY_DN168983_c0_g2 | Up-Down-Down-Down-Down    | 0.5696                               |
| BPTI_Kunitz                         | TRINITY_DN178763_c1_g1 | Down-Up-Up-Up-Down        | 0.5                                  |
| BPTI_Kunitz                         | TRINITY_DN178763_c2_g3 | Down-Up-Up-Down-Down      | 0.5                                  |
| BPTI_Kunitz                         | TRINITY_DN178763_c2_g4 | Down-Up-Up-Down-Down      | 0.5                                  |
| BPTI_Kunitz                         | TRINITY_DN180147_c1_g1 | Up-Down-Up-Up-Down        | 0.4711                               |
| BPTI_Kunitz                         | TRINITY_DN59474_c0_g1  | Down-Up-Up-Down-Up        | 0.3917                               |

|                                |                         |                          |        |
|--------------------------------|-------------------------|--------------------------|--------|
| BPTI_Kunitz                    | TRINITY_DN73045_c0_g2   | Down-Up-Up-Up-Down       | 0.4874 |
| C1Q                            | TRINITY_DN155170_c0_g2  | EE-EE-Down-Down-Down     | 0.3437 |
| C1Q                            | TRINITY_DN81311_c0_g1   | Down-Up-Up-Up-Up         | 0.9457 |
| Chitin_binding_(Sushi)         | TRINITY_DN178147_c0_g1  | Down-Up-Up-Up-Down       | 0.4996 |
| Chitin_binding_(VWA)           | TRINITY_DN177076_c0_g1  | Down-Up-Up-Up-Down       | 0.8702 |
| Chitin_Synthase_(Myosin-Ploop) | TRINITY_DN180880_c4_g1  | Down-Up-Down-Up-Up       | 0.4999 |
| C-lectin_(Perlucin)            | TRINITY_DN107937_c0_g1  | Down-Up-Up-Up-Up         | 0.1899 |
| C-lectin_(Perlucin)            | TRINITY_DN111847_c0_g1  | Down-Up-Up-Up-Up         | 0.9678 |
| C-lectin_(Perlucin)            | TRINITY_DN117910_c0_g1  | Down-Up-Up-Up-Up         | 0.8755 |
| C-lectin_(Perlucin)            | TRINITY_DN141305_c0_g1  | Down-Up-Up-Up-Up         | 0.9746 |
| C-lectin_(Perlucin)            | TRINITY_DN146282_c1_g1  | EE-EE-Up-Down-EE         | 0.1955 |
| C-lectin_(Perlucin)            | TRINITY_DN156726_c0_g2  | Down-Up-Up-Up-Up         | 0.504  |
| C-lectin_(Perlucin)            | TRINITY_DN160524_c5_g2  | Down-Down-Down-Down-Down | 0.2449 |
| C-lectin_(Perlucin)            | TRINITY_DN173794_c0_g2  | Down-Up-Up-Up-Up         | 0.4792 |
| C-lectin_(Perlucin)            | TRINITY_DN179775_c0_g2  | EE-Down-Down-Down-Down   | 0.4614 |
| C-lectin_(Perlucin)            | TRINITY_DN180930_c1_g1  | Down-Up-Up-Up-Up         | 0.3908 |
| Concanavalin_A                 | TRINITY_DN177325_c0_g1  | Down-Up-Down-Down-Down   | 0.8594 |
| Cyclophilin_PPIase             | TRINITY_DN154373_c0_g2  | Down-Down-Down-Down-Down | 0.5    |
| Cyclophilin_PPIase             | TRINITY_DN157791_c0_g1  | Up-Down-Down-Up-Down     | 0.4982 |
| Cyclophilin_PPIase             | TRINITY_DN162724_c0_g1  | Up-Down-Down-Up-Down     | 0.4998 |
| Cyclophilin_PPIase             | TRINITY_DN167409_c0_g4  | Down-EE-EE-EE-Down       | 0.4087 |
| Cyclophilin_PPIase             | TRINITY_DN169298_c1_g1  | Up-Down-Down-Up-Down     | 0.3218 |
| Cyclophilin_PPIase             | TRINITY_DN171027_c1_g12 | Down-Up-Up-Up-Down       | 0.5    |

|                      |                        |                          |        |
|----------------------|------------------------|--------------------------|--------|
| Dermatopontin        | TRINITY_DN163610_c2_g3 | Down-Down-Down-Down-Down | 0.9441 |
| Dopamine_B-h-ase     | TRINITY_DN147142_c0_g1 | Down-Up-Up-Up-Up         | 0.5297 |
| Dopamine_B-h-ase     | TRINITY_DN167284_c0_g1 | Down-Up-Up-Up-Up         | 0.9664 |
| Dopamine_B-h-ase     | TRINITY_DN172693_c0_g5 | Up-Down-Down-Down-Down   | 0.4659 |
| Dopamine_B-h-ase     | TRINITY_DN175579_c4_g2 | Up-Down-Down-Down-Down   | 0.4912 |
| Fibronectin_III_(IG) | TRINITY_DN170889_c0_g5 | Down-Up-Up-Up-Up         | 0.4638 |
| Fibronectin_III_(IG) | TRINITY_DN171964_c0_g1 | Down-Up-Up-Down-Down     | 0.5    |
| Fibronectin_III_(IG) | TRINITY_DN174919_c0_g6 | Down-Down-Up-Up-Down     | 0.4983 |
| Fibronectin_III_(IG) | TRINITY_DN174919_c0_g7 | Down-Down-Up-Up-Down     | 0.4949 |
| Fibronectin_III_(IG) | TRINITY_DN180108_c1_g1 | Up-Down-Down-Down-Up     | 0.4989 |
| Fibronectin_III_(IG) | TRINITY_DN180472_c4_g4 | Up-Down-Up-Up-Up         | 0.4117 |
| Fibronectin_III_(IG) | TRINITY_DN180652_c2_g2 | Down-Up-Up-Up-Up         | 0.4998 |
| Fibronectin_III_(IG) | TRINITY_DN180733_c3_g2 | Down-Up-EE-EE-EE         | 0.4998 |
| Fibronectin_III_(IG) | TRINITY_DN181145_c5_g1 | Down-Down-Down-Down-Up   | 0.4939 |
| Fibronectin_III_(IG) | TRINITY_DN181243_c4_g2 | Down-Up-Up-Up-Down       | 0.6769 |
| Filament_(Filamin)   | TRINITY_DN158160_c0_g2 | Down-Up-Up-Down-Down     | 0.5018 |
| Filament_(Filamin)   | TRINITY_DN170104_c0_g5 | Down-Up-Up-Up-Down       | 0.5    |
| Filament_(Filamin)   | TRINITY_DN174754_c0_g1 | EE-Down-EE-EE-EE         | 0.499  |
| Filament_(Filamin)   | TRINITY_DN174767_c1_g7 | Down-Up-Up-Down-Down     | 0.5    |
| Filament_(Filamin)   | TRINITY_DN177697_c2_g2 | Down-Up-Up-Down-Down     | 0.5008 |
| Filament_(Filamin)   | TRINITY_DN178513_c0_g1 | Up-Down-Down-Down-Up     | 0.4949 |
| Filament_(Filamin)   | TRINITY_DN180618_c0_g1 | Down-Up-Up-Down-Down     | 0.5    |
| Filament_(Filamin)   | TRINITY_DN180761_c0_g3 | Down-Up-Down-Down-Down   | 0.5    |
| Filament_(Filamin)   | TRINITY_DN181051_c4_g1 | Down-Up-Up-Up-Up         | 0.5    |

|                     |                        |                          |        |
|---------------------|------------------------|--------------------------|--------|
| Filament_(Filamin)  | TRINITY_DN181268_c3_g2 | Down-Up-Up-Down-Down     | 0.5    |
| Filament_(Filamin)  | TRINITY_DN181271_c0_g2 | Down-Up-Up-Down-Up       | 0.5    |
| Filament_(Filamin)  | TRINITY_DN181327_c8_g1 | Down-Down-Up-Up-Up       | 0.4961 |
| Filament_(Filamin)  | TRINITY_DN181331_c4_g1 | Down-Up-Up-Down-Up       | 0.5    |
| Gigasins_3a         | TRINITY_DN134486_c0_g1 | Down-Up-Up-Up-Up         | 0.6087 |
| Gly-Hyd_(Chitinase) | TRINITY_DN156856_c2_g1 | Down-Up-Up-Up-Down       | 0.7134 |
| Gly-Hyd_(Chitinase) | TRINITY_DN162472_c0_g3 | Down-Up-Up-Up-Up         | 0.4053 |
| Gly-Hyd_(Chitinase) | TRINITY_DN162472_c0_g4 | Down-Up-Up-Up-Up         | 0.5383 |
| Gly-Hyd_(Chitinase) | TRINITY_DN165152_c0_g1 | Down-Up-Up-Up-Up         | 0.5362 |
| Gly-Hyd_(Chitinase) | TRINITY_DN166699_c0_g2 | Down-Up-Up-Up-Up         | 0.5666 |
| Gly-Hyd_(Chitinase) | TRINITY_DN166785_c1_g4 | Down-Up-Up-Down-Down     | 0.5    |
| Gly-Hyd_(Chitinase) | TRINITY_DN167601_c0_g1 | Down-Up-Up-Up-Down       | 0.4996 |
| Gly-Hyd_(Chitinase) | TRINITY_DN173599_c0_g4 | Up-Up-Up-Up-Up           | 0.3727 |
| Gly-Hyd_(Chitinase) | TRINITY_DN173976_c1_g4 | Up-Down-Down-Down-Down   | 0.5178 |
| Gly-Hyd_(Chitinase) | TRINITY_DN174242_c0_g2 | Down-Up-EE-EE-Down       | 0.4998 |
| Haem_Peroxidase     | TRINITY_DN149477_c0_g1 | Down-Down-Down-Down-Down | 0.7277 |
| Haem_Peroxidase     | TRINITY_DN150505_c0_g1 | Down-Up-Up-Up-Up         | 0.4969 |
| Haem_Peroxidase     | TRINITY_DN163196_c0_g1 | Down-Up-Up-Down-Down     | 0.4957 |
| Haem_Peroxidase     | TRINITY_DN164523_c1_g1 | Down-Down-Down-Down-Down | 0.5004 |
| Haem_Peroxidase     | TRINITY_DN165764_c0_g5 | Down-Down-Down-Down-Down | 0.422  |
| Haem_Peroxidase     | TRINITY_DN166945_c3_g1 | Up-Down-Down-Down-Up     | 0.4718 |
| Haem_Peroxidase     | TRINITY_DN175179_c1_g2 | EE-EE-EE-Down-Down       | 0.4827 |
| Haem_Peroxidase     | TRINITY_DN176052_c1_g6 | Down-Up-Up-Down-Down     | 0.4957 |



|                     |                         |                          |        |
|---------------------|-------------------------|--------------------------|--------|
| Kazal_domain        | TRINITY_DN150779_c0_g1  | Up-Down-Up-Up-Up         | 0.4826 |
| Kazal_domain        | TRINITY_DN174904_c1_g16 | Up-Down-Up-Up-Up         | 0.2418 |
| Peptidase_C1A       | TRINITY_DN144206_c0_g1  | Down-Up-Up-Up-Up         | 0.6174 |
| Peptidase_C1A       | TRINITY_DN146921_c0_g1  | Down-Up-Up-Up-Up         | 0.9842 |
| Peptidase_C1A       | TRINITY_DN162930_c0_g1  | Down-Up-Up-Up-Up         | 0.8632 |
| Peptidase_C1A       | TRINITY_DN168131_c0_g1  | Down-Up-Up-Up-Up         | 0.6678 |
| Peptidase_C1A       | TRINITY_DN175117_c1_g5  | EE-EE-EE-Up-Up           | 0.4935 |
| Peroxiredoxin       | TRINITY_DN164166_c0_g2  | Down-Up-Up-Up-Up         | 0.5032 |
| RLCD                | TRINITY_DN155318_c2_g1  | Down-Up-Up-Up-Up         | 0.5064 |
| RLCD                | TRINITY_DN156777_c0_g1  | Down-Up-Up-Up-Up         | 0.5252 |
| RLCD                | TRINITY_DN164779_c2_g2  | Down-Up-Up-Up-Up         | 0.6154 |
| RLCD                | TRINITY_DN165306_c0_g1  | Down-Up-Up-Up-Down       | 0.7192 |
| RLCD                | TRINITY_DN171531_c0_g2  | Down-Up-Down-Down-Down   | 0.5    |
| RLCD                | TRINITY_DN176059_c0_g1  | EE-EE-Up-EE-Down         | 0.4817 |
| RLCD                | TRINITY_DN178042_c3_g1  | EE-EE-Up-Up-Up           | 0.4263 |
| RLCD                | TRINITY_DN178597_c2_g3  | Down-Down-Down-Down-Down | 0.4888 |
| SCP-domain          | TRINITY_DN147565_c0_g2  | Down-Up-Up-Up-Down       | 0.5    |
| Transgelin-Calponin | TRINITY_DN157616_c1_g5  | Down-Up-Up-Up-Down       | 0.4998 |
| Transgelin-Calponin | TRINITY_DN164856_c3_g1  | Down-Up-Up-Up-Up         | 0.5    |
| Transgelin-Calponin | TRINITY_DN165228_c0_g1  | Up-Down-Down-Down-Up     | 0.5    |
| Transgelin-Calponin | TRINITY_DN168946_c1_g5  | Down-Up-Up-Up-Up         | 0.9045 |
| Transgelin-Calponin | TRINITY_DN169712_c1_g3  | Down-Up-Up-Up-Up         | 0.8298 |
| Transgelin-Calponin | TRINITY_DN180079_c2_g4  | Down-Up-Up-Up-Up         | 0.6561 |
| Tyrosinase          | TRINITY_DN155153_c0_g1  | EE-Down-EE-Down-Down     | 0.3951 |

|            |                        |                        |        |
|------------|------------------------|------------------------|--------|
| Tyrosinase | TRINITY_DN155544_c0_g1 | Up-Down-Down-Down-Down | 0.476  |
| Tyrosinase | TRINITY_DN157611_c0_g2 | Down-Up-Up-Up-Down     | 0.5    |
| Tyrosinase | TRINITY_DN168278_c1_g2 | Down-Up-Up-Up-Up       | 0.3746 |
| Tyrosinase | TRINITY_DN174850_c0_g1 | Up-Down-Up-Down-Down   | 0.1338 |
| Tyrosinase | TRINITY_DN179853_c0_g1 | Down-Up-Down-Down-Down | 0.5    |
| Tyrosinase | TRINITY_DN181289_c7_g1 | Down-Up-Up-Down-Down   | 0.5    |
| U          | TRINITY_DN161545_c4_g3 | Down-Up-Up-Down-Down   | 0.5    |

---

**Supplementary Table S7. Expression profiles of contigs encoding ion transport proteins in Baltic *M. edulis*-like larvae depicted in figures 1-3. EE refers to equally expressed.**

| Figure | Contig_ID                                                                  | Expression profile           | Maximum posterior probability |
|--------|----------------------------------------------------------------------------|------------------------------|-------------------------------|
| 1a     | Anion exchanger-<br>TRINITY_DN173786_c0_g2                                 | Up-Down-Down-<br>Down-Down   | 0.4986                        |
| 1a     | Anion exchanger-<br>TRINITY_DN179651_c3_g2                                 | Down-Up-Down-<br>Down-Down   | 0.4361                        |
| 1a     | Anion transporter-<br>TRINITY_DN165520_c0_g2                               | Down-Up-Up-Up-<br>Down       | 0.5008                        |
| 1a     | Anion transporter-<br>TRINITY_DN166908_c0_g4                               | Up-Down-Down-<br>Down-Down   | 0.467                         |
| 1a     | Anion transporter-<br>TRINITY_DN169687_c0_g2                               | Down-Up-Up-Down-<br>Down     | 0.5                           |
| 1b     | Sodium bicarbonate cotransporter-<br>TRINITY_DN175808_c1_g5                | Down-Up-Down-<br>Down-Down   | 0.6333                        |
| 1c     | Electrogenic sodium bicarbonate<br>cotransporter-<br>TRINITY_DN95691_c0_g1 | Down-Up-Down-<br>Down-Down   | 0.8781                        |
| 1c     | Electroneutral sodium bicarbonate<br>exchanger-<br>TRINITY_DN166271_c2_g1  | Up-Down-Down-<br>Down-Up     | 0.5047                        |
| 1c     | Electroneutral sodium bicarbonate<br>exchanger-<br>TRINITY_DN167998_c0_g2  | EE-Down-Down-EE-<br>Up       | 0.449                         |
| 1c     | Electroneutral sodium bicarbonate<br>exchanger-<br>TRINITY_DN176772_c2_g1  | Down-Up-Up-Up-<br>Down       | 0.3413                        |
| 1d     | Prestin- TRINITY_DN173725_c0_g1                                            | Down-Up-Up-Up-<br>Down       | 0.5291                        |
| 2a     | Calcium transporting ATPase-<br>TRINITY_DN170482_c0_g1                     | Up-Down-Down-<br>Down-Up     | 0.4454                        |
| 2a     | Plasma membrane calcium transporting<br>ATPase- TRINITY_DN179905_c2_g1     | Down-Down-Down-<br>Down-Down | 0.5                           |
| 2a     | SERCA- TRINITY_DN155835_c0_g1                                              | Down-Up-Up-Up-Up             | 0.5                           |
| 2a     | SERCA-TRINITY_DN174921_c2_g3                                               | Down-Up-Up-Up-Up             | 0.5147                        |
| 2b     | Sodium/Calcium exchanger-<br>TRINITY_DN176141_c2_g2                        | EE-Up-Up-EE-EE-              | 0.4824                        |
| 2b     | Sodium/Calcium exchanger-<br>TRINITY_DN171813_c0_g4                        | Down-Up-EE-Down-<br>EE       | 0.4313                        |
| 2b     | Sodium/Calcium exchanger-<br>TRINITY_DN174400_c0_g2                        | Up-Down-Down-Up-<br>Up       | 0.4992                        |

|    |                                                               |                              |        |
|----|---------------------------------------------------------------|------------------------------|--------|
| 3a | NKA alpha subunit-<br>TRINITY_DN173934_c0_g2                  | Down-Down-Down-<br>Down-Down | 0.5005 |
| 3a | NKA beta subunit-<br>TRINITY_DN169083_c0_g2                   | Up-Down-Down-<br>Down-Down   | 0.5126 |
| 3b | Mitochondrial NHE-<br>TRINITY_DN165050_c0_g1                  | Down-Down-Down-<br>Down-Down | 0.4981 |
| 3b | Mitochondrial NHE-<br>TRINITY_DN178761_c3_g2                  | Down-Down-Down-<br>Down-Down | 0.5002 |
| 3b | NHE regulatory cofactor-<br>TRINITY_DN178396_c3_g2            | Down-Up-Up-Up-Up             | 0.5    |
| 3c | Inward rectifier potassium channel-<br>TRINITY_DN157228_c0_g1 | Up-Down-Down-<br>Down-Down   | 0.7796 |
| 3c | Inward rectifier potassium channel-<br>TRINITY_DN159142_c1_g1 | Down-Up-Up-Down-<br>Down     | 0.4989 |
| 3d | Calcium activated chloride channel-<br>TRINITY_DN166073_c0_g1 | Down-Up-Up-Up-Up             | 0.4653 |
| 3d | Chloride channel-<br>TRINITY_DN176195_c1_g1                   | Down-Up-Up-Up-Up             | 0.5059 |
| 3d | Intracellular chloride channel-<br>TRINITY_DN177659_c2_g3     | Down-Up-Up-Up-Up             | 0.5808 |

---
